1 **FcγR responses to soluble immune complexes of varying size: A scalable cell-based**  
2 **reporter system**

3 Haizhang Chen<sup>1,2</sup>, Andrea Maul-Pavicic<sup>3,4</sup>, Martin Holzer<sup>5</sup>, Ulrich Salzer<sup>3</sup>, Nina Chevalier<sup>3</sup>,  
4 Reinhard E. Voll<sup>3,4</sup>, Hartmut Hengel<sup>1,2,#</sup> & Philipp Kolb<sup>1,2,#</sup>

5

6 <sup>1</sup>Institute of Virology, University Medical Center, Albert-Ludwigs-University Freiburg,  
7 Hermann-Herder-Str. 11, 79104 Freiburg, Germany

8 <sup>2</sup>Faculty of Medicine, Albert-Ludwigs-University Freiburg, 79104 Freiburg, Germany

9 <sup>3</sup>Department of Rheumatology and Clinical Immunology, Medical Center - University of  
10 Freiburg, Faculty of Medicine, University of Freiburg, Hugstetterstr. 55, 79106 Freiburg,  
11 Germany

12 <sup>4</sup>Center for Chronic Immunodeficiency (CCI), Medical Center-University of Freiburg, Faculty  
13 of Medicine, University of Freiburg, Breisacherstr. 115, 79106 Freiburg, Germany

14 <sup>5</sup>Institute for Pharmaceutical Sciences, Albert-Ludwigs-University Freiburg, Hermann-Herder-  
15 Str. 9, 79104 Freiburg, Germany

16 #corresponding authors

17

18 **Summary**

19 This study describes a novel cell-based reporter assay enabling the detection and  
20 quantification of multimeric soluble IgG immune complexes (sICs). By selective activation of  
21 specific FcγRs, the assay shows sensitivity to sIC size and responds to synthetic and clinically  
22 relevant sICs in sera from SLE patients and autoimmune-prone mice.

23

24 **Abstract**

25 Fcγ-receptor (FcγR) activation by antibody derived soluble immune complexes (sICs) is a  
26 major contributor to inflammation in autoimmune diseases such as systemic lupus  
27 erythematosus (SLE). A robust and scalable test system allowing for the detection and  
28 quantification of sICs with regard to receptor activation is missing. We developed a

29 comprehensive cell-based reporter system capable of measuring the sIC-mediated activation  
30 of human and mouse FcγRs individually. We show that compared to human FcγRs IIB and III,  
31 human FcγRs I and IIA lack sensitivity to sICs. The assay enables measurement of FcγR  
32 activation in response to sIC size and demonstrates a complete translation of the Heidelberger-  
33 Kendall precipitation curve to FcγR responsiveness. The assay also proved useful to quantify  
34 sICs-mediated FcγR activation using sera from SLE patients and mouse models of lupus and  
35 arthritis. Thus, in clinical practice, our assay might be employed as a diagnostic tool to measure  
36 FcγR activation as a biomarker for disease activity in immune-complex mediated disease.

37

## 38 **Introduction**

39 Immunoglobulin G (IgG) is the dominant immunoglobulin isotype in chronic infections and in  
40 antibody-mediated autoimmune diseases. The multi-faced effects of the IgG molecule rely both  
41 on the F(ab) regions, which recognize a specific antigen to form immune complexes (ICs), and  
42 the constant Fc region (Fcγ), which is detected by Fcγ receptors (FcγRs) found on most cells  
43 of the immune system (Lu et al., 2018). When IgG binds to its antigen ICs are formed, which,  
44 depending on the respective antigen, are either cell-bound or soluble (sICs). The composition  
45 of sICs is dependent on the number of epitopes recognized by IgG on a single antigen  
46 molecule and the ability of the antigen to form multimers. Fcγ-FcγR binding is necessary but  
47 not sufficient to activate FcγRs with receptor cross-linking generally underlying receptor  
48 activation (Bruhns et al., 2009b; Ravetch and Bolland, 2001; van der Poel et al., 2011). Cell  
49 bound ICs are readily able to cross-link FcγRs (Bruhns et al., 2009b; Lux et al., 2013). This  
50 induces various signaling pathways (Greenberg et al., 1994; Kiefer et al., 1998; Luo et al.,  
51 2010) which in turn regulate immune cell effector functions (Bournazos et al., 2017;  
52 Nimmerjahn and Ravetch, 2010). It is also suggests that sICs can dynamically tune FcγR  
53 activation, meaning that changes in sIC size directly impact FcγR responses (Lux et al., 2013).  
54 However, the molecular requirements are largely unknown. Also, a functional reproduction of  
55 the paradigmatic Heidelberger-Kendall precipitation curve, describing that the molecular size

56 of sICs determined by the antibody:antigen ratio dynamically tunes FcγR  
57 activation(Heidelberger and Kendall, 1929), is missing.

58 Generally, IC-mediated FcγR cross-linking is indispensable to initiate the full signal cascade  
59 following immune cell activation (Duchemin et al., 1994; Getahun and Cambier, 2015; Luo et  
60 al., 2010). Human FcγRs are membrane resident receptors recognizing Fcγ. Among all type I  
61 FcγRs, FcγRIIB (CD32B) is the only inhibitory one signaling via immunoreceptor tyrosine-  
62 based inhibitory motifs (ITIMs) while the activating receptors are associated with  
63 immunoreceptor tyrosine-based activation motifs (ITAMs). Another exception is FcγRIIIB  
64 (CD16B), which is glycosylphosphatidylinositol (GPI)-anchored (Bruhns, 2012; Bruhns and  
65 Jonsson, 2015; Nimmerjahn and Ravetch, 2006; Nimmerjahn and Ravetch, 2008). FcγRI  
66 (CD64) is the only receptor with high affinity binding to monomeric IgG not associated with  
67 antigen and is primarily tasked with phagocytosis linked to antigen processing and pathogen  
68 clearance (Guilliams et al., 2014; Indik et al., 1994). All the other FcγRs only efficiently bind to  
69 complexed, meaning antigen-bound IgG (Bruhns, 2012; Bruhns and Jonsson, 2015; Lu et al.,  
70 2018). While FcγRI, FcγRIIB and FcγRIIIA are able to recognize sICs, this has not been  
71 reported for FcγRIIA (CD32A), rather this receptor has recently been shown to depend on the  
72 neonatal Fc receptor (FcRn) to do so (Fossati et al., 2002b; Hubbard et al., 2020).

73 Activation of FcγRs leads to a variety of cellular effector functions such as antibody-dependent  
74 cellular cytotoxicity (ADCC) by natural killer (NK) cells via FcγRIIIA, antibody-dependent  
75 cellular phagocytosis (ADCP) by macrophages via FcγRI, cytokine and chemokine secretion  
76 by NK cells and macrophages via FcγRIIIA. Furthermore, reactive oxygen species (ROS)  
77 production of neutrophils and neutrophil extracellular traps formation (NETosis) via FcγRIIIB,  
78 dendritic cell (DC) maturation and antigen presentation via FcγRIIA and B cell selection and  
79 differentiation via FcγRIIB (Berger et al., 1996; Bournazos et al., 2017; Granger et al., 2019;  
80 Kang et al., 2016; Laborde et al., 2007; Pincetic et al., 2014; Tay et al., 2019; Vidarsson et al.,  
81 2014). Consequently, FcγRs regulate and connect both innate and adaptive branches of the  
82 immune system. Various factors have been indicated to influence the IC-dependent FcγR  
83 activation profiles, including Fcγ-FcγR binding affinity and avidity (Koenderman, 2019), IgG

84 subclass, glycosylation patterns and genetic polymorphisms (Bruhns et al., 2009a; Pincetic et  
85 al., 2014; Plomp et al., 2017; Vidarsson et al., 2014), stoichiometric antigen-antibody-ratio  
86 (Berger et al., 1996; Lux et al., 2013; Pierson et al., 2007) and FcγR clustering patterns (Patel  
87 et al., 2019). For example, glycosylation patterns of the IgG Fc domain initiate either pro- or  
88 anti-inflammatory effector pathways by tuning the binding affinity to activating or inhibitory  
89 FcγRs, respectively (Bohm et al., 2014). However, despite being explored individually, the  
90 functional consequences of these features when acting in combination on a single receptor  
91 are still not fully understood. Therefore, an assay allowing for the systematic functional  
92 assessment of IC-mediated FcγR activation is strongly required. sICs and immobilized ICs  
93 represent intrinsically different stimuli for the immune system (Fossati et al., 2002a; Granger  
94 et al., 2019). Soluble circulating ICs are commonly associated with chronic viral or bacterial  
95 infections (Wang and Ravetch, 2015; Yamada et al., 2015) and some autoimmune diseases,  
96 such as systemic lupus erythematosus (SLE) or rheumatoid arthritis (RA) (Antes et al., 1991;  
97 Koffler et al., 1971; Zubler et al., 1976). Typically, sICs related disorders are characterized by  
98 systemic cytokine secretion (Mathsson et al., 2007; Vogelpoel et al., 2015) as well as immune  
99 cell exhaustion and senescence (Bano et al., 2019; Tahir et al., 2015). In order to study sIC-  
100 dependent activation of FcγRs in detail, we employed a cell-based assay which has been  
101 previously utilized to study immobilized ICs (Corrales-Aguilar et al., 2013) and adapted it into  
102 a sIC sensitive reporter system capable of distinguishing the activation of individual FcγRs and  
103 their responses to varying complex size. This allowed for the first time a complete reproduction  
104 of the Heidelberger-Kendall precipitation curve measuring actual FcγR activation. The assay  
105 also enables a quantification of clinically relevant sICs in sera from SLE patients and  
106 autoimmune-prone mice with immune-complex-mediated arthritis and lupus using reporter  
107 cells expressing chimeric mouse FcγRs.

108

109

110

111

## 112 **Results**

113

### 114 **Experimental assay setup**

115 The assay used in this study was adapted from a previously described cell-based FcγR  
116 activation assay designed to measure receptor activation in response to opsonized virus  
117 infected cells (Corrales-Aguilar et al., 2013) or therapeutic Fc-fusion proteins (Lagasse et al.,  
118 2019). We changed the assay setup to enable measurement of sICs when directly incubated  
119 with reporter cells stably expressing the ectodomains of the human FcγR fused to the signaling  
120 module of the mouse CD3-ζ chain (FcγRI: Acc# LT744984; FcγRIIA: Acc# M28697;  
121 FcγRIIB/C: Acc# LT737639; FcγRIIIA/B: Acc# LT737365). Ectodomains of FcγRIIIA and  
122 FcγRIIIB as well as ectodomains of FcγRIIB and FcγRIIC are identical. Second generation  
123 reporter cells were generated to stably express chimeric FcγRs compared to the stable  
124 transfectants used in the original assay (Corrales-Aguilar et al., 2013). To this end, BW5147  
125 cells were transduced as described previously via lentiviral transduction (Corrales-Aguilar et  
126 al., 2013; Van den Hoecke et al., 2017). Human FcγR expression on transduced cells after  
127 puromycin selection is shown in Fig. 1A. Activation of the reporter cells is measured by  
128 quantification of mouse IL-2 (mIL-2) secretion into the cell culture supernatant using an anti-  
129 IL-2 sandwich ELISA as described previously (Corrales-Aguilar et al., 2013). In order to employ  
130 the original assay, designed to measure ICs on adherent infected cells, for the detection of  
131 soluble ICs we first determined the suspension of IgG achieved by pre-blocking a 96 well  
132 ELISA microtiter plate using PBS/10%FCS. To this end, we compared different concentrations  
133 of FCS in the blocking reagent and measured the threshold at which IgG (rituximab, Rtx) no  
134 longer binds to the plate and stays in solution. Fig. 1B clearly shows that FCS supplementation  
135 to 1% (v/v) or higher is sufficient to keep antibodies in solution and prevents IgG binding to the  
136 plastic surface. Using this adapted protocol, the assay allows for the characterization of FcγR  
137 interaction with immobilized ICs versus sICs as shown schematically in Fig. 1C. Next, we set  
138 out to test if immobilized IgG is an appropriate substitute for opsonized cells or immobilized  
139 ICs with regard to FcγR activation as suggested before (Tanaka et al., 2009).

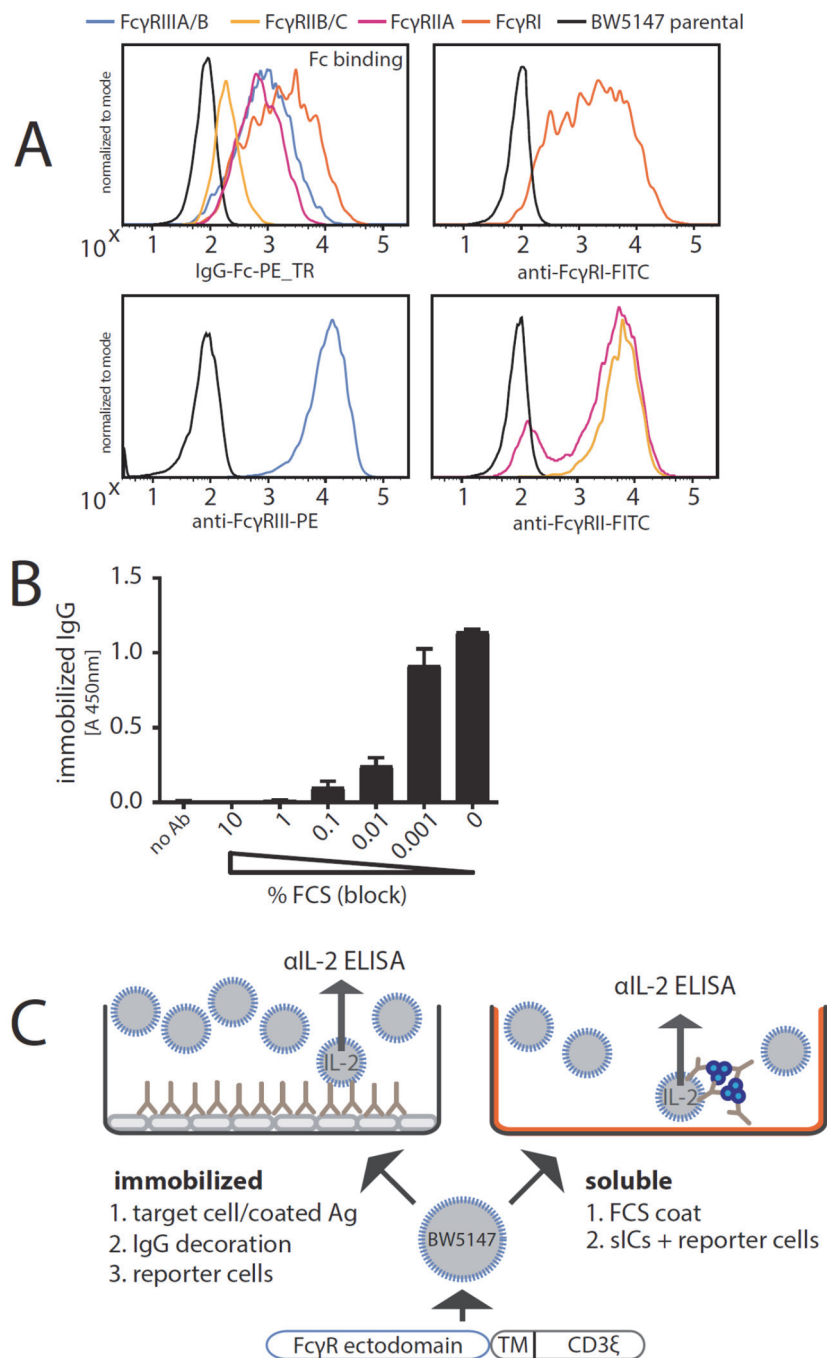

140

141 **Fig. 1. Establishment of a cell-based reporter assay measuring FcγR activation in**  
 142 **response to sICs.** A) BW5147 reporter cells stably expressing human FcγRs or BW5147  
 143 parental cells were stained with FcγR specific conjugated mAbs as indicated and measured  
 144 for surface expression of FcγRs via flow cytometry. Fcγ binding was determined using a PE-  
 145 TexasRed-conjugated human IgG-Fc fragment. B) FCS coating of an ELISA plate allows for  
 146 suspension of subsequently added IgG. Plate bound IgG was quantified via ELISA. PBS  
 147 supplemented with >1% FCS (v/v) avoids adhesion of IgG (rituximab, Rtx) to the ELISA plate.  
 148 C) Schematic of an immobilized IC or soluble IC setup. BW5147 reporter cells expressing  
 149 chimeric human FcγR receptors secrete IL-2 in response to FcγR activation by clustered IgG.  
 150 Soluble ICs are generated using mAbs and multivalent antigens (blue). Solubility is achieved  
 151 by pre-blocking an ELISA plate using PBS supplemented with 10% FCS (orange).

152 There was no qualitative difference in FcγR activation between immobilized Rtx, immobilized  
153 ICs (Rtx + CD20) or Rtx-opsionized 293-CD20 cells, showing that FcγR cross-linking by  
154 clustered IgG alone is sufficient for receptor activation (Fig. 2). As sICs formed by monomeric  
155 CD20 peptide (aa 141-188) and Rtx completely failed to activate FcγRs, we hypothesized that,  
156 in order to generate sICs able to activate FcγRs, antigens have to be multivalent. Of note, to  
157 reliably and accurately differentiate between soluble and immobilized triggers using this assay,  
158 reagents for the generation of ICs need to be of high purity and consistent stability. Only  
159 combinations of therapy grade ultra-pure mAbs and ultra-pure antigens (size exclusion  
160 chromatography) showed reproducible, dose-dependent and specific activation of the reporter  
161 assay (data not shown).

162

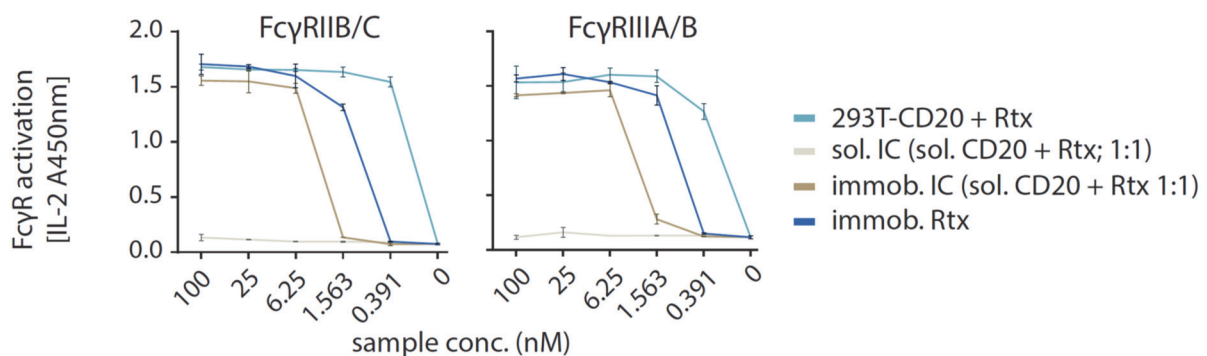

163

164 **Fig. 2. FcγRIIB/C and FcγRIIIA/B do not respond to small hetero-dimeric sICs but are**  
165 **sensitive to immobilized IgG/ICs.** Dose-dependent activation of FcγR-bearing reporter cells  
166 by immobilized IC can be mimicked by immobilized IgG. Response curves of human FcγRIIB/C  
167 and FcγRIIIA/B are similar between opsonized cells (293T cells stably expressing CD20 + Rtx),  
168 immobilized IC (rec. soluble CD20 + Rtx) and immobilized IgG (Rtx). sIC formed by  
169 monovalent antigen (rec. soluble CD20) do not activate human FcγRs. X-Axis shows sample  
170 concentration determined by antibody molarity. Y-Axis shows FcγR activation determined by  
171 reporter cell IL-2 production.

172

### 173 Quantification of human FcγR responsiveness to multimeric sICs

174 There are only few commercially available antibody-antigen pairs that meet both the above  
175 mentioned high grade purity requirements while also allowing for multimeric sIC formation. We  
176 focused on three pairs of multivalent antigens and their respective mAbs that were available  
177 in required amounts enabling large-scale titration experiments; trimeric rhTNFα:IgG1 infliximab

178 (TNF $\alpha$ :Ixf), dimeric rhVEGFA: IgG1 bevacizumab (VEGFA/Bvz) and dimeric rhIL-5: IgG1  
179 mepolizumab (IL-5/Mpz). As lymphocytes express TNF $\alpha$ -receptors I and II while not  
180 expressing receptors for IL-5 or VEGFA, we tested whether our mouse lymphocyte derived  
181 BW5147 thymoma reporter cell line is sensitive to high concentrations of rhTNF $\alpha$ . Toxicity  
182 testing revealed that even high concentrations up to 76.75 nM rhTNF $\alpha$  did not affect viability  
183 of reporter cells (Fig. S1). Next, we measured the dose-dependent activation of human Fc $\gamma$ R  
184 comparing immobilized IgG to soluble ICs using the Fc $\gamma$ R reporter cell panel (Fig. 3).  
185 Soluble antigen or mAb alone served as negative controls showing no background activation  
186 even at high concentrations. Immobilized rituximab served as a positive control for inter-  
187 experimental reference. We observed that all Fc $\gamma$ R are strongly activated in a dose-  
188 dependent manner when incubated with immobilized IgG. Incubating the Fc $\gamma$ R reporter cells  
189 with sICs at identical molarities showed Fc $\gamma$ R<sub>IIIB/C</sub> and Fc $\gamma$ R<sub>IIIA/B</sub> to be efficiently activated  
190 by sICs, while in contrast, Fc $\gamma$ R<sub>IIA</sub> and Fc $\gamma$ R<sub>I</sub> did not respond to sICs. We furthermore  
191 observed Fc $\gamma$ R<sub>IIIA/B</sub> to be efficiently activated by sICs with responses even surpassing those  
192 achieved with immobilized IgG for TNF $\alpha$ /Ixf and IL-5/Mpz ICs. Fc $\gamma$ R<sub>IIIB/C</sub> showed a generally  
193 weaker reactivity towards sICs compared to immobilized ICs, especially at high concentrations  
194 whereas an inversion of this order was seen for TNF $\alpha$ /Ixf and VEGFA/Bvz ICs at lower  
195 concentrations. IL-5/Mpz, Fc $\gamma$ R<sub>IIIB/C</sub> and Fc $\gamma$ R<sub>IIIA/B</sub> showed similar responsiveness towards  
196 immobilized or sICs with a generally stronger activation on immobilized ICs. These  
197 experiments demonstrate that sICs of different composition vary in the resulting Fc $\gamma$ R  
198 activation pattern, most likely due to the antigens being either dimeric, trimeric or different in  
199 size.



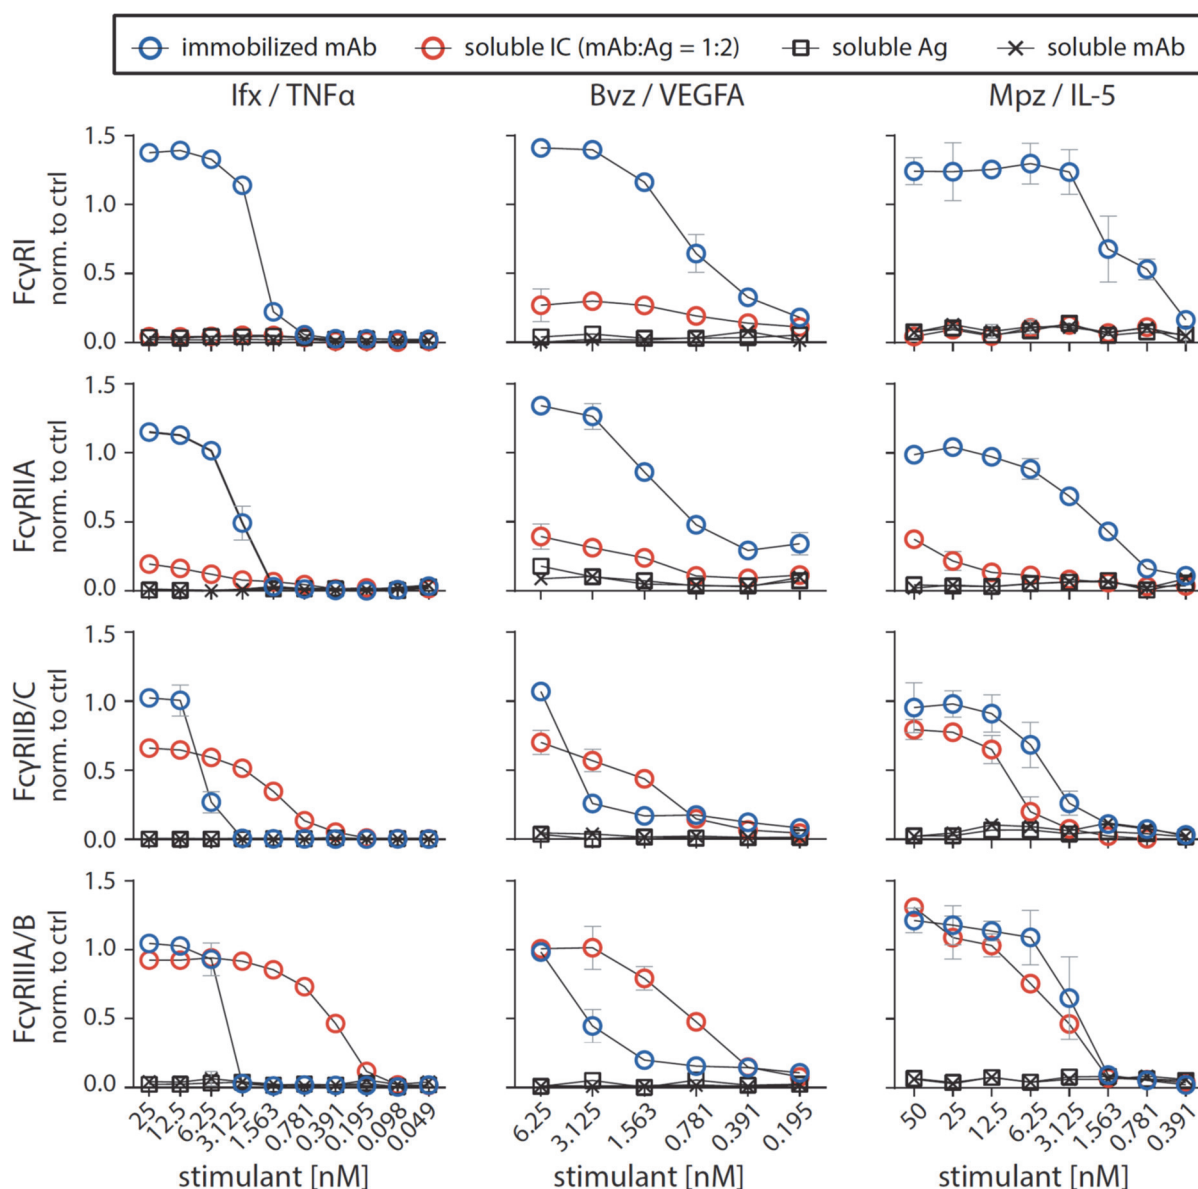

200

201 **Fig. 3. Fc $\gamma$ RIIB/C and Fc $\gamma$ RIIIA/B are activated by sICs formed from multivalent antigens.**

202 Three different multivalent ultra-pure antigens (Ag) mixed with respective therapy-grade mAbs  
 203 were used to form sICs as indicated for each set of graphs (top to bottom). IC pairs: infliximab  
 204 (Ifx) and rhTNF $\alpha$ ; mepolizumab (Mpz) and rhIL-5; bevacizumab (Bvz) and rhVEGFA. X-Axis:  
 205 concentrations of stimulant expressed as molarity of either mAb or Ag monomer and IC  
 206 (expressed as mAb molarity) at a mAb:Ag ratio of 1:2. Soluble antigen or soluble antibody  
 207 alone served as negative controls and were not sufficient to activate human Fc $\gamma$ R.  
 208 Fc $\gamma$ R responses were normalized to immobilized rituximab (Rtx) at 1 $\mu$ g/well (set to 1) and a medium  
 209 control (set to 0). All Fc $\gamma$ R show dose-dependent activation towards immobilized IgG. Fc $\gamma$ RIIA  
 210 shows low activation at high sIC concentrations compared to immobilized IgG activation. Fc $\gamma$ RI  
 211 shows no activation towards sICs. Fc $\gamma$ RIIIA/B and Fc $\gamma$ RIIB/C are dose-dependently activated  
 212 by sICs with responses comparable in strength to immobilized IgG stimulant. Experiments  
 213 performed in technical replicates. Error bars = SD. Error bars smaller than symbols are not  
 214 shown.

215

216 Next, to validate the measured differences in response to sICs vs. immobilized IC for primary  
217 cells, we determined FcγRIIIA activation using primary human NK cells isolated from PBMCs  
218 of healthy donors. Measuring a panel of activation markers and cytokine responses by flow  
219 cytometry, we observed a differential activation pattern depending on ICs being soluble or  
220 immobilized at equal molarity (Fig. 4A). We chose IL-5/Mpz sICs as NK cells do not express  
221 the IL-5 receptor. While MIP1-β responses were comparable between the two triggers,  
222 degranulation (CD107a) and TNFα responses showed a trend towards lower activation by sICs  
223 compared to immobilized IgG (Mpz). Strikingly, IFNγ responses were significantly weaker  
224 when NK cells were incubated with sICs compared to immobilized IgG. In order to confirm this  
225 hierarchy of responses and to enhance the overall low activation by Fcγ compared to the PMA  
226 control, we changed the IC setup by generating reverse-orientation sICs consisting of human  
227 FcγR-specific mAbs and goat-anti-mouse IgG F(ab)<sub>2</sub> fragments. NK cell activation by reverse  
228 sICs was compared to NK cell activation by immobilized FcγR specific mAbs (Fig. 4B). Here,  
229 we not only confirm our previous observations regarding MIP-1β and IFNγ, but we also confirm  
230 significantly lower TNFα and CD107a responses towards soluble complexes compared to  
231 immobilized mAbs. Importantly, these experiments validate that sICs readily activate primary  
232 NK cells and induce immunological effector functions. As in 10% of the population NK cells  
233 express FcγRIIC (Breunis et al., 2008; Metes et al., 1998), we also tested if this receptor plays  
234 a role in our measurements. Using the same three donors and an FcγRII specific mAb as  
235 described above, we did not observe an FcγRII-mediated response. Accordingly, we conclude  
236 that FcγRIIC expression did not play a role in our experiments (Fig. 4C). Taken together, we  
237 show that multivalent but not dimeric soluble immune complexes govern primary NK cell  
238 response and FcγRIIIA/B activation (Fig. 2A).

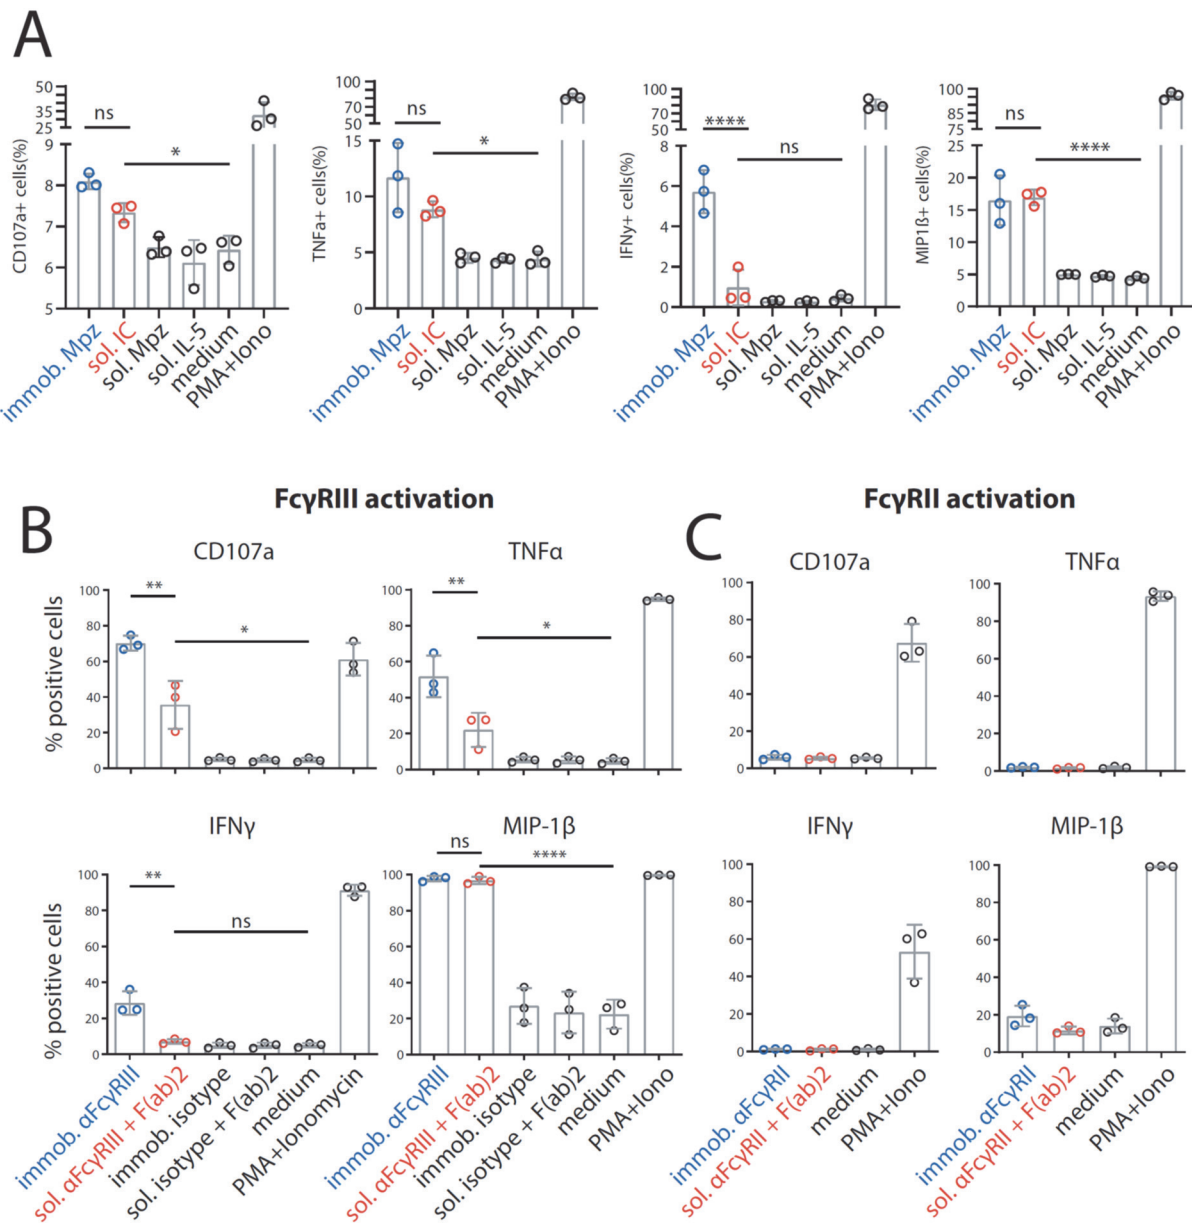

239

240 **Fig. 4. The FcγRIII-dependent activation pattern of primary NK cells depends on IC**  
 241 **solubility.** Primary NK cells purified from PBMCs of three different donors were tested for NK  
 242 cell activation markers. Error bars = SD. Two-way ANOVA (Turkey). A) NK cells were  
 243 incubated with immobilized IgG (mepolizumab, Mpz), soluble IC (Mpz:IL-5 = 1:1), soluble Mpz  
 244 or soluble IL-5 (all at 200 nM, 10<sup>6</sup> cells). Incubation with PMA and Ionomycin (Iono) served as  
 245 a positive control. Incubation with medium alone served as a negative control. B) NK cells were  
 246 incubated with immobilized FcγRIII-specific mAb, soluble mouse-anti-human IgG F(ab)<sub>2</sub>  
 247 complexed FcγRIII-specific mAb (reverse sICs), immobilized IgG of non-FcγRIII-specificity  
 248 (isotype control) or soluble F(ab)<sub>2</sub> complexed isotype control (all at 1 μg, 10<sup>6</sup> cells). Incubation  
 249 with PMA and Ionomycin served as a positive control. Incubation with medium alone served  
 250 as a negative control. C) As in B using an FcγRII-specific mAb. NK cells from the tested donors  
 251 in this study do not react to FcγRII activation.  
 252

253

254 **Measurement of Fc $\gamma$ R activation in response to changing sIC size.**

255 We observed that the dimeric sIC CD20:Rtx completely failed to activate our reporter cells,  
256 while potentially larger sICs based on multimeric antigens showed an efficient dose-dependent  
257 Fc $\gamma$ R activation. In order to determine whether the assay is able to respond to changes in sIC  
258 size, we tested cross-titrated amounts of antibody (mAb, infliximab, Ix) and antigen (Ag,  
259 rhTNF $\alpha$ ). To this end, the reporter cells were incubated with sIC of different mAb:Ag ratio by  
260 fixing one parameter and titrating the other. According to the Heidelberger-Kendall precipitation  
261 curve (Heidelberger and Kendall, 1929) describing sIC size as being dependent on the mAb:Ag  
262 ratio, this should result in varying sIC sizes as an excess of either antigen or antibody results  
263 in the formation of smaller complexes compared to the large molecular complexes formed at  
264 around equal molarity. Changes in sIC size due to a varying mAb:Ag ratio were quantified  
265 using asymmetrical flow-field flow fractionation (AF4) (Fig. 5A and Table S1). Fig. S2 shows  
266 an exemplary complete run of such an analysis. AF4 analysis identifies the highest sIC mean  
267 molecular being approximately 2130 kDa at a 1:3 ratio (mAb:Ag) with sICs getting smaller with  
268 increasing excess of either antigen or antibody, recapitulating a Heidelberger-Kendall-like  
269 curve. Incubation of the Fc $\gamma$ R reporter cells with ICs of varying size indeed shows that the  
270 assay responds to changes in sIC size (Fig. 5B). Accordingly, both Fc $\gamma$ R types showed the  
271 strongest responses at mAb:Ag ratios of approximately 1:3. We then set out to test the  
272 accuracy of our reporter cell assay as a surrogate marker for primary human immune cells  
273 expressing Fc $\gamma$ Rs. To this end, we isolated primary NK cells from three individual donors and  
274 measured NK cell MIP1- $\beta$  upregulation in response to synthetic sICs of varying size and  
275 composition again using a similar assay setup optimized for NK cell activation. We chose MIP-  
276 1 $\beta$  upregulation as a cell surface marker to measure NK cell activation as it showed the highest  
277 responsiveness in previous experiments (Fig. 4). We could observe that primary immune cells  
278 expressing Fc $\gamma$ RIIIA respond to IC size, confirming our assay to be an accurate surrogate for  
279 primary immune cell responses to soluble ICs (Fig. 5C). Convincingly, NK cell responses to  
280 sICs generated from trimeric antigen (rhTNF $\alpha$ ) peaked at a different mAb:Ag ratio compared  
281 to NK cell responses to sICs generated from dimeric antigens (rhIL-5 and rhVEGFA). Of note,

282 TNF $\alpha$  and VEGFA activate resting NK cells thus leading to higher MIP1- $\beta$  positivity when NK  
283 cells are incubated in the presence of excess antigen. As NK cells do not express IL-5 receptor,  
284 this is not observed in the presence of excess IL-5. Regarding TNF $\alpha$ , NK cells still show a  
285 stronger activation by sICs generated under optimal mAb:Ag ratios compared to conditions  
286 where excess antigen is used. This shows a clear correlation between IC size and effector  
287 response. Conversely, when changing antibody concentrations using fixed amounts of antigen,  
288 a consistent reduction of NK cell activation is observed in the presence of excess IgG for all  
289 three mAb/Ag pairs.  
290

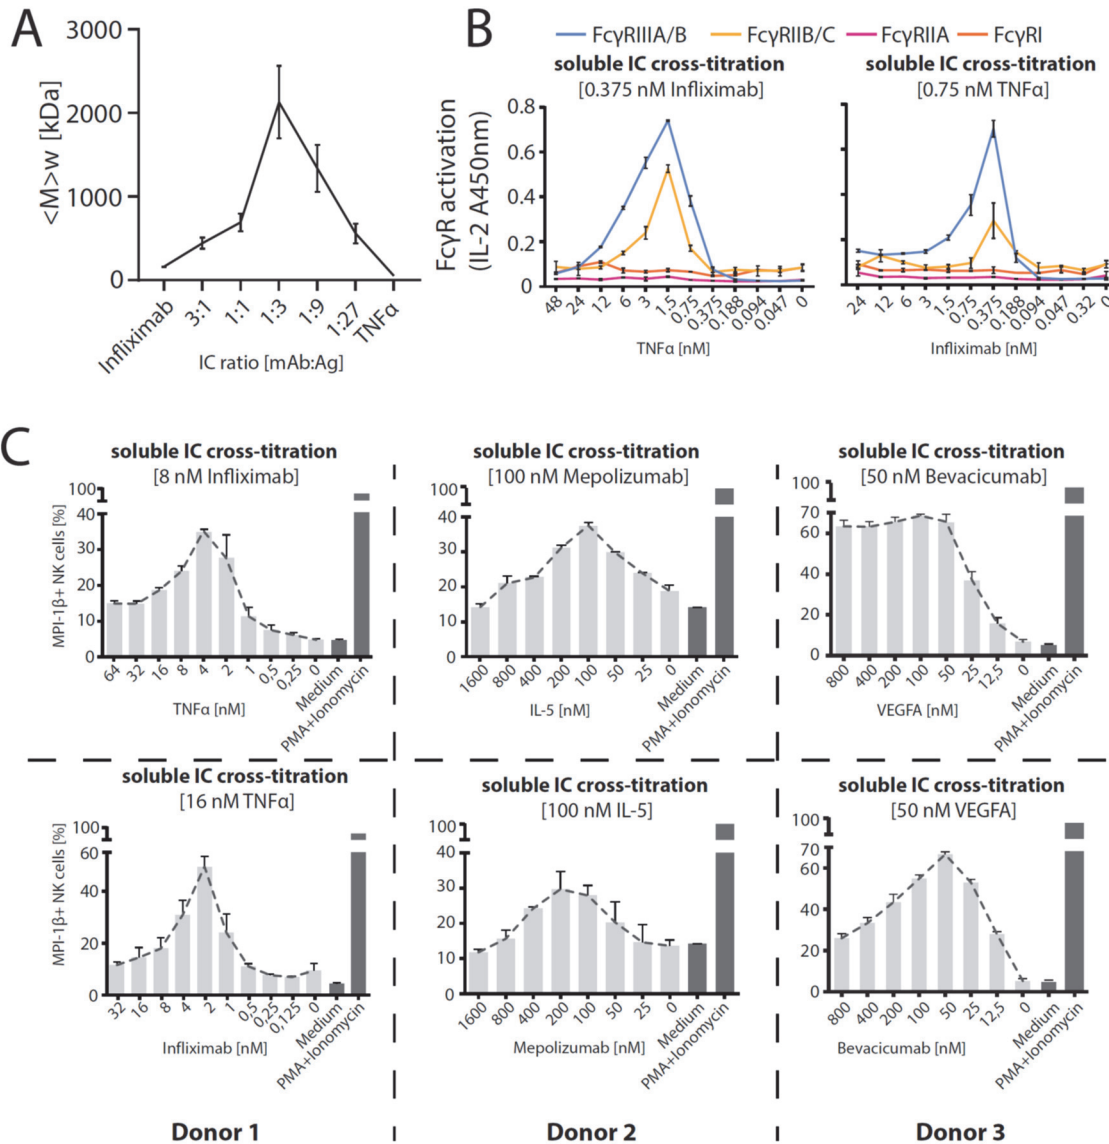

291

292 **Fig. 5. The reporter assay responds to IC size reproducing a Heidelberger-Kendall like**

293 **precipitation curve with a functional read-out.** A) infliximab (mAb) and rhTNF $\alpha$  (Ag) were

294 mixed at different ratios (17  $\mu$ g total protein, calculated from monomer molarity) and analysed

295 via AF4. sIC size is maximal at a 1:3 ratio of mAb:Ag and reduced when either mAb or Ag are

296 given in excess.  $\langle M \rangle_w$  = mass-weighted mean of the molar mass distribution. Three

297 independent experiments. Error bars = SD. Data taken from Table S1. One complete run

298 analysis is shown in Fig. S2. B) Fc $\gamma$ R BW5147 reporter cell activation is sensitive to sIC size.

299 sICs of different size were generated by cross-titration according to the AF4 determination.

300 Reporter cells were incubated with fixed amounts of either mAb (infliximab, left) or Ag (rhTNF $\alpha$ ,

301 right) and titrated amounts of antigen or antibody, respectively. X-Axis shows titration of either

302 antigen or antibody, respectively (TNF $\alpha$  calculated as monomer). IL-2 production of reporter

303 cells shows a peak for Fc $\gamma$ RIIB/C and Fc $\gamma$ RIIIA/B activation at an antibody:antigen ratio

304 between 1:2 and 1:4. Fc $\gamma$ Rs I and IIA show no activation towards sICs in line with previous

305 observations. Two independent experiments. Error bars = SD. C) Primary NK cells purified by

306 negative selection magnetic bead separation from three different donors were incubated with

307 cross-titrated sICs as in A. NK cells were measured for MIP-1 $\beta$  expression (% positivity).

308 Incubation with PMA and Ionomycin served as a positive control. Incubation with medium alone

309 served as a negative control. Measured in technical replicates. Error bars = SD.

310 **Quantification of reactive sICs in sera of SLE patients.**

311 In order to apply the assay to a clinically relevant condition we measured circulating sICs  
312 present in the serum of SLE patients with variable disease activity. Sera from 4 healthy donors  
313 and 25 SLE patients were investigated for FcγRIIIA/B and FcγRIIB/C activation. Reporter cells  
314 produced IL-2 in response to patient sera in a dose-dependent manner (shown exemplarily for  
315 one group of SLE patients in Fig. 6A), which was not the case when sera from healthy controls  
316 were tested. Consistent with the observation that FcγRI and FcγRIIA do not respond to  
317 synthetic sICs, reporter cells expressing these receptors did also not respond to the tested  
318 serum samples. While this reaction pattern already indicated that sICs are the reactive  
319 component measured in SLE patients' sera, we further demonstrate that FcγRIIIA/B and  
320 FcγRIIB/C activation depends on the presence of serum ICs by analyzing patient serum before  
321 and after polyethylene glycol (PEG) precipitation of sICs (Fig. 6B). Next, we calculated the  
322 area under the curve (AUC) values for all 25 SLE patient titrations and normalized them to the  
323 AUC values measured for healthy individuals. The resulting index values were then correlated  
324 with established biomarkers of SLE disease activity, such as anti-dsDNA titers ( $\alpha$ -dsDNA) and  
325 concentrations of the complement cleavage product C3d (Fig. 6C). Both biomarkers are  
326 believed to indirectly indicate the presence of sICs. We observed a significant correlation  
327 between our FcγRIIIA/B activation index values and the determined disease activity markers,  
328 anti-dsDNA titers and C3d ( $p=0.0078$  and  $p=0.0118$ , respectively). FcγRIIB/C on the other  
329 hand showed no significant correlation with either biomarker. We assume this may be due to  
330 the influence of IgG sialylation found to be reduced in active SLE (Vuckovic et al., 2015).  
331 Generally, de-sialylation of IgG leads to stronger binding by the activating receptors FcγRI,  
332 FcγRIIA and FcγRIII while it reduces the binding affinity of the inhibitory FcγRIIB (Kaneko et  
333 al., 2006). In sum, our assay allows the indirect quantification of clinically relevant sICs in sera  
334 of SLE patients.

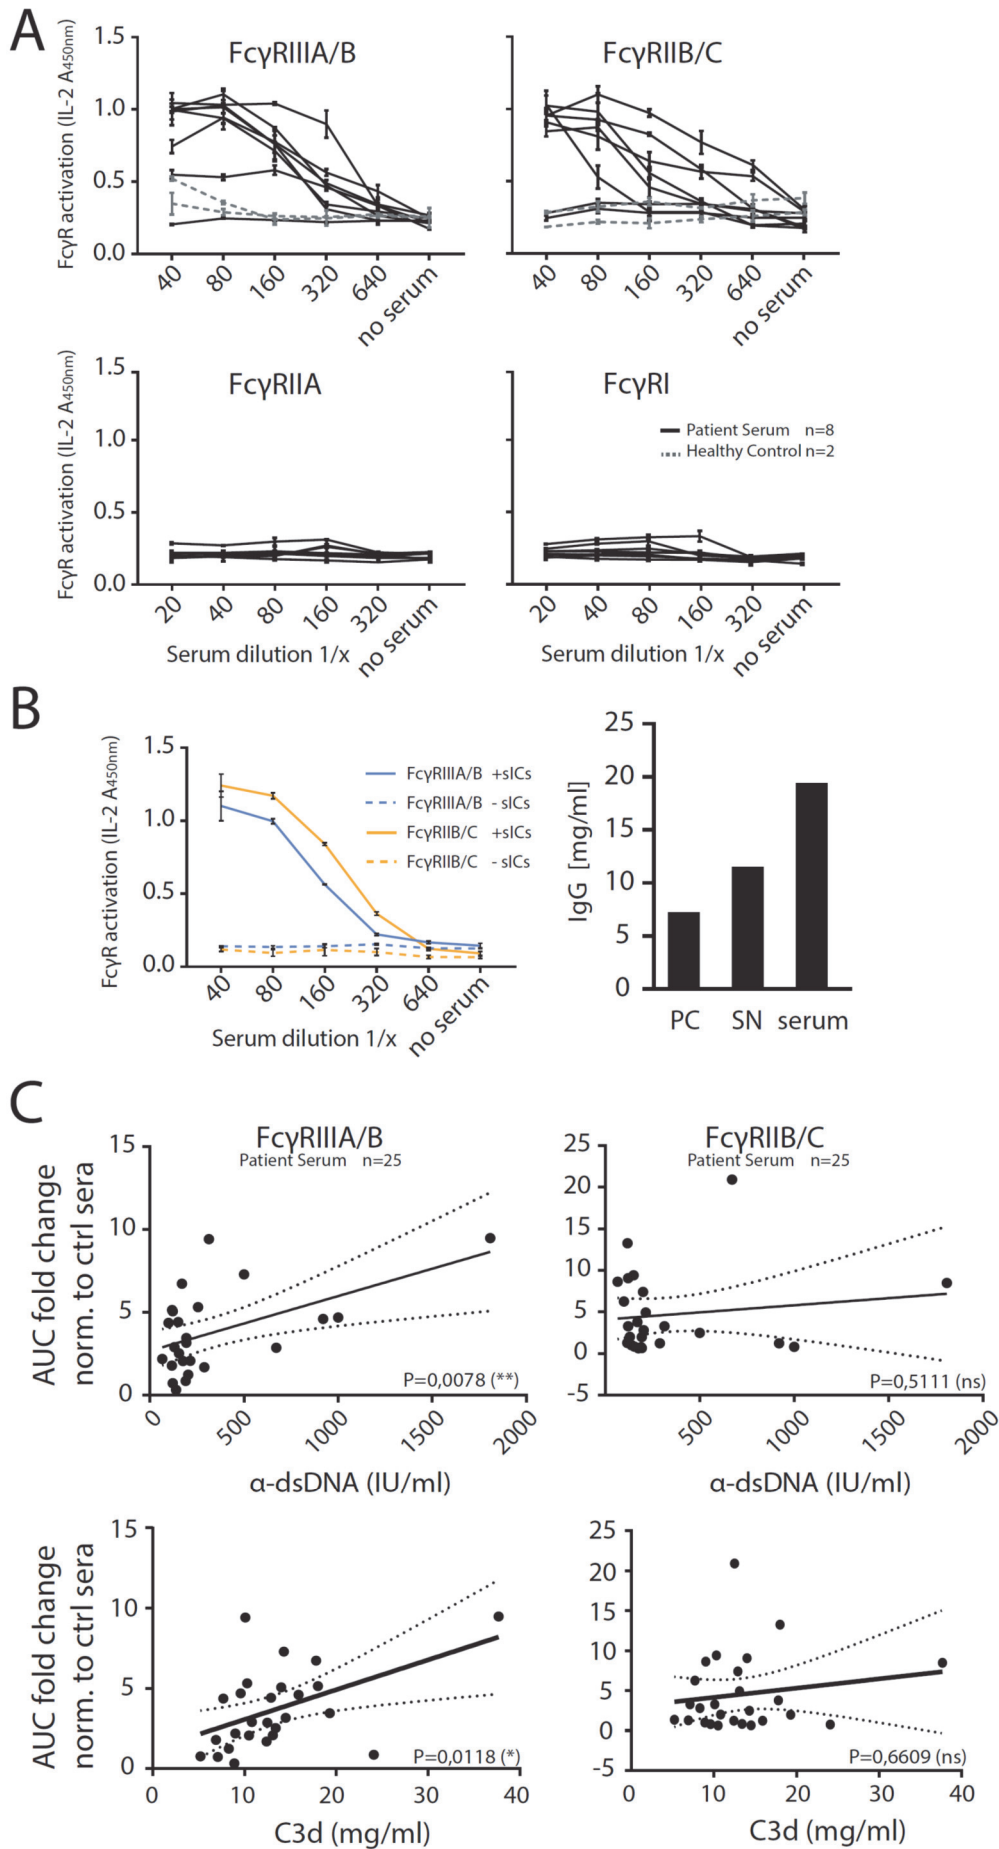



336 **Fig. 6. The reporter assay enables quantification of serum-derived sIC from SLE**  
337 **patients.** Serum derived sIC from systemic lupus erythematosus (SLE) patients activate  
338 human FcγR reporter cells. 25 patients and 4 healthy control individuals were separated into  
339 three groups for measurement. A) Experiments shown for an exemplary group of 8 SLE  
340 patients and two healthy individuals. Dose-dependent reactivity of FcγRs IIIA/B and IIB/C was  
341 observed only for SLE patient sera and not for sera from healthy individuals. FcγRs I and IIA  
342 show no reactivity towards clinical IC in line with previous observations. B) Activation of FcγRs  
343 IIB/C and IIIA/B by patient serum is mediated by serum derived sICs. Patient serum was  
344 depleted of sICs by PEG precipitation and the supernatant was compared to untreated serum  
345 regarding FcγR activation (left). IgG concentration in the precipitate (SN), supernatant (SN)  
346 and untreated serum is shown in the bar graph (right). IC precipitation did not remove IgG from  
347 the supernatant. C) FcγRIIIA/B activation, but not FcγRIIB/C activation, significantly correlates  
348 with known SLE disease markers. FcγR activation data from A was correlated to established  
349 SLE disease markers ( $\alpha$ -dsDNA levels indicated as IU/ml or C3d concentrations indicated as  
350 mg/ml). FcγR activation from a dose-response curve as in A was calculated as area under  
351 curve (AUC) for each SLE patient (n=25) or healthy individual (n=4) and expressed as fold  
352 change compared to the healthy control mean. SLE patients with  $\alpha$ -dsDNA levels below 50  
353 IU/ml and C3d values below 9 mg/ml were excluded. Two-tailed Pearson correlation.  
354

#### 355 **Translation to clinically relevant *in vivo* lupus and arthritis mouse models.**

356 BW5147 reporter cells stably expressing chimeric mouse as well as rhesus macaque FcγRs  
357 have already been generated using the here described method and were successfully used to  
358 measure FcγR activation by opsonized adherent cells in previous studies (Kolb et al., 2019;  
359 Van den Hoecke et al., 2017) (mFcγR reporter cells). As the human FcγR reporter cells  
360 described here are sensitive to sICs, we next aimed to translate the assay to clinically relevant  
361 animal models. To this end, we incubated previously described FcγR reporter cells expressing  
362 chimeric mouse FcγRs (Van den Hoecke et al., 2017) with sera from lupus (NZB/WF1) or  
363 arthritis (K/BxN) mice with active disease. The reporter assay was performed as described  
364 above. We chose to measure the stimulation of the activating receptors, mFcγRIII and  
365 mFcγRIV, that correspond to human FcγRIII and show a comparable cellular distribution and  
366 immune function (Bruhns and Jonsson, 2015). Incubation with synthetic sICs generated from  
367 rhTNF $\alpha$  and mouse-anti-hTNF $\alpha$  IgG1 showed both of the mFcγR reporter cells to be  
368 responsive to sICs (Fig. 7A). Parental BW5147 cells expressing no FcγRs served as a negative  
369 control. The sera of three mice per group were analysed and compared to sera from wildtype  
370 C57BL/6 mice, which served as a negative control. We consistently detected mFcγR activation  
371 by sera from K/BxN or NZB/WF1 compared to BL6 mice (Fig. 7B). While the mFcγRIII

372 responses were generally high and similar between K/BxN and NZB/WF1 mice, we found a  
373 lower and more variable mFcγRIV responsiveness. We assume this might be explained by  
374 differences in mFcγR affinity to mouse IgG subclasses. While mFcRIII binds IgG1, IgG2a and  
375 IgG2b with comparable affinity, IgG1 is not detected by mFcRIV (Bruhns and Jonsson, 2015).  
376 Further, we found that the response of mFcγRIV-expressing reporter cells shows no strict  
377 dose-dependency. This effect was more pronounced for NZB/WF1 compared to K/BxN mice.  
378 In addition, in this case we assume an influence of factors such as glycosylation patterns or  
379 subclass composition, not further addressed here. Nevertheless, the assay enables the  
380 reliable detection of sICs in sera of mice with immune-complex mediated diseases making it a  
381 promising novel tool to monitor sICs as a biomarker of disease activity.

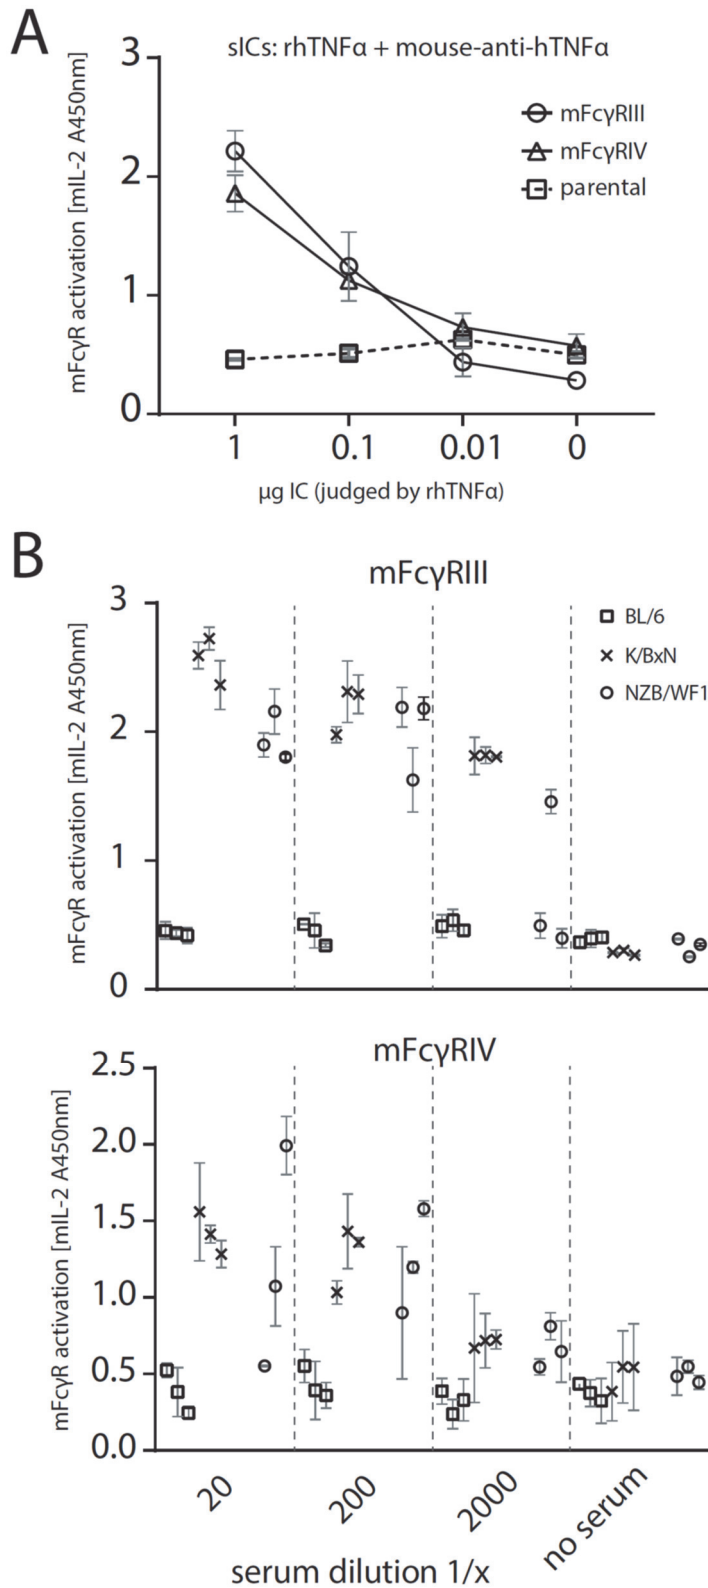

382

383 **Fig. 7. The reporter assay can be translated to mouse models of autoimmune disease.**

384 A) Reporter cells expressing mFcyRIII, mFcyRIV or parental BW5147 cells were incubated  
385 with titrated amounts of synthetic sICs generated from rhTNF $\alpha$  and mouse-anti-hTNF $\alpha$  at a 1:1  
386 ratio by mass. One experiment in technical replicates. Error bars = SD. B) Titrations of 3 mouse  
387 sera per group (BL/6, K/BxN or NZB/WF1) were incubated with mFcyR reporter cells and FcyR  
388 activation was assessed as described above. Sera from BL/6 mice served as negative control.  
389 Performed in technical replicates. Error bars = SD.

390 **Discussion**

391

392 **A novel assay for the quantification of synthetic as well as disease-associated sICs.**

393 We developed a cell-based reporter system capable of quantifying the IgG-IC mediated  
394 activation of individual human and mouse FcγRs. We show that the assay is exquisitely specific  
395 for immobilized ICs as well as soluble ICs. This assay presents a meaningful advancement in  
396 methodology as it enables the direct detection of receptor-activating ICs. This is of great value  
397 for autoimmune diseases such as systemic lupus erythematosus (SLE) and rheumatoid  
398 arthritis (RA), where circulating ICs crucially contribute to disease manifestations (Koffler et al.,  
399 1971; Zubler et al., 1976) and for certain infectious diseases such as COVID-19 caused by  
400 SARS-CoV2 (Vuitton et al., 2020) or chronic hepatitis B virus (HBV) infection, in which  
401 circulating sICs are generated (Madalinski et al., 1991; Wang and Ravetch, 2015). We  
402 demonstrated that the here described assay enables quantification of serum-derived  
403 circulating sICs from SLE patients with regard to FcγR reactivity. Further, the sIC-mediated  
404 FcγR activation correlated with SLE disease markers. Thus, the assay may serve as promising  
405 new tool to measure sIC as disease biomarker in autoimmunity or infection. We also show the  
406 potential of this assay to be translated to clinically relevant animal models. As the assay also  
407 enables the measurement of dose-dependent FcγR responses this allows the (semi-)  
408 quantitative detection of sICs in various samples such as mAb preparations for clinical use.  
409 The presence of ICs in therapeutic preparations or their formation following patient treatment  
410 is unwanted due to the dangers of side effects such as lupus-like syndrome which has been  
411 linked to mAb treatment in patients receiving infliximab (Wetter and Davis, 2009). As this assay  
412 is sensitive to any aggregation of IgG, it also represents a tool to control the purity and quality  
413 of mAb preparations developed for therapeutic use in patients. In addition, the assessment of  
414 sIC-mediated FcγR activation allows for optimization of mAb preparations targeting cytokines  
415 and soluble factors, which would result in sIC formation, designed for reduced or enhanced  
416 FcγR activation such as glyco-engineered mAbs or LALA-mutant mAbs (Li et al., 2017;

417 Saunders, 2019). Notably, the scalability of this cell-based test system does allow for large-  
418 scale screening of samples.

419

420 **FcγR activation profiles differ dependent on the solubility and size of clustered IgG.**

421 We observed a difference in the response patterns for FcγRIIIA/B and FcγRII/B/C depending  
422 on the solubility of clustered IgG (immobilized versus soluble ICs) which we validated for  
423 FcγRIIIA using primary human NK cells. It should be emphasized that multimeric, but not  
424 dimeric sICs can trigger FcγR activation. This highlights the fundamental influence of the  
425 antigen and subsequent sIC size on FcγR-dependent signal transduction. The ability of the  
426 here described assay to quantify the activation of individual FcγR by sICs is not achievable  
427 or directly comparable using primary cells due to non-uniform immune responses upon FcγR  
428 activation and as different immune cells express FcγRs in different combinations as well as  
429 variable densities. Finally, and in contrast to primary human cells, our murine reporter cells are  
430 largely inert to human cytokines, which provides a key advantage to measure FcγR activation  
431 selectively in response to sIC.

432 Human FcγRIIIA mediates ADCC elicited by NK cells and the induction of a pro-inflammatory  
433 cytokine profile by CD16<sup>+</sup> monocytes, while FcγRIIIB is a GPI-anchored receptor on  
434 neutrophils. FcγRIIB is an inhibitory receptor expressed by B cells and dendritic cells (DCs)  
435 regulating B cell activation, antibody production by plasma cells and the activation state of  
436 DCs, while the activating FcγRIIC is found on NK cells mediating ADCC. However, as FcγRIIC  
437 is only expressed by less than 20% of the human population, its role is still poorly understood  
438 (Anania et al., 2019; Lisi et al., 2011). Given the here shown difference in FcγR reactivity  
439 towards multimeric sICs versus immobilized IgG it is tempting to speculate that FcγRIIIA/B-  
440 and FcγRIIB/C-positive immune cells might have adapted to differentially perceive the different  
441 FcγR ligands (sICs versus membrane bound insoluble ICs) and translate them into distinct  
442 reaction patterns. This could be achieved by these cells via differences in receptor density,  
443 signal transduction or regulation of receptor expression. Consulting the literature indeed  
444 supports our hypothesis with neutrophils, B cells and NK cells being efficiently activated by

445 sICs via essentially the same receptor ectodomains (Goodier et al., 2016; Kang et al., 2016;  
446 Mayadas et al., 2009; Nimmerjahn and Ravetch, 2008), while the immunological outcome of  
447 their reaction very much differs.

448

#### 449 **Revisiting the Heidelberger-Kendall curve: Dynamic sIC size measurement and** 450 **monitoring of activity in sIC-associated diseases.**

451 We provide for the first time a simultaneous functional and biophysical assessment of the  
452 paradigmatic Heidelberger-Kendall precipitation curve (Heidelberger and Kendall, 1929).  
453 While previous work revealed that large and small sICs show differential impact on IL-6  
454 production in PBMCs (Lux et al., 2013), the dynamics of Fc $\gamma$ R activation resulting from  
455 constant changes in sIC size have not been explored in great detail yet. This was achieved in  
456 this study by directly analyzing native molecules via AF4 (Fig. 5A, Fig. S2, Table S1). Our data  
457 reveal that sIC size is indeed governed by antibody:antigen ratios covering a wide range of  
458 sizes up to several megadaltons. In the presence of increasing amounts of antibody or antigen  
459 deviating from an optimal antibody:ratio, sIC size steadily decreases. Further, by the  
460 measurement of Fc $\gamma$ R activation of we now translate sIC size directly to an immunologically  
461 meaningful read-out. In doing so, we show that sIC size essentially tunes Fc $\gamma$ R activation and  
462 thereby immune cell responses. Thus, our new test system can not only contribute to the  
463 functional detection and quantification of clinically relevant sICs but also provides a starting  
464 point on how to avoid pathological consequences by influencing the sIC size, for example by  
465 administering therapeutic antibodies or recombinant antigens in optimized concentrations, thus  
466 becoming relevant in clinical pharmacokinetics.

467

#### 468 **Limitations of the reporter system and conclusions**

469 We found that Fc $\gamma$ RI is not activated by sICs in our assay. We assume that Fc $\gamma$ RI activation  
470 by sICs might require a native cellular environment given that a major function is the uptake of  
471 ICs even in the absence of a signaling motif (Indik et al., 1994). However, we find that Fc $\gamma$ RI  
472 ectodomains alone are not responsive to sICs indicating a different cross-linking threshold for

473 FcγRI possibly linked to it being the only high-affinity FcγR with three extracellular Ig domains  
474 compared to the two domains found in other FcγRs. This reflects a general consideration  
475 regarding the reporter system. While providing a robust and unified read-out using a scalable  
476 cell-based approach, the assay is not able to reflect native immune cell functions governed by  
477 cell specific signalling cascades. The major advancements of this reporter system include i) a  
478 higher accuracy regarding FcγR activation compared to strict affinity measurement, ii) an sIC  
479 size dependent quantification of FcγR responsiveness and iii) the identification of FcγR  
480 activating sICs in autoimmunity but also infection. Finally, this scalable, sensitive and robust  
481 system to detect FcγR activating sICs in clinical samples might enable their identification  
482 diseases that have not been linked to sIC-mediated pathology, yet.

483

## 484 **Materials and Methods**

485

### 486 **Cell culture**

487 All cells were cultured in a 5% CO<sub>2</sub> atmosphere at 37°C. BW5147 mouse thymoma cells (BW,  
488 obtained from ATCC: TIB-47) were maintained at 3x10<sup>5</sup> to 9x10<sup>5</sup> cells/ml in Roswell Park  
489 Memorial Institute medium (RPMI GlutaMAX, Gibco) supplemented with 10% (vol/vol) fetal calf  
490 serum (FCS, Biochrom), sodium pyruvate (1x, Gibco) and β-mercaptoethanol (0.1 mM, Gibco).  
491 293T-CD20 (kindly provided by Irvin Chen, UCLA (Morizono et al., 2010)) were maintained in  
492 Dulbecco's modified Eagle's medium (DMEM, Gibco) supplemented with 10% (vol/vol) FCS.

493

### 494 **FcγR receptor activation assay**

495 FcγR activation was measured adapting a previously described cell-based assay (Corrales-  
496 Aguilar et al., 2014; Corrales-Aguilar et al., 2013). The assay was modified to measure FcγR  
497 activation in solution. Briefly, 2x10<sup>5</sup> BW-FcγR (BW5147) reporter cells were incubated with  
498 synthetic sIC in a total volume of 100 μl for 16 h at 37°C and 5% CO<sub>2</sub>. Incubation was performed  
499 in a 96-well ELISA plate (Nunc maxisorp) pre-treated with PBS/10% FCS (v/v) for 1 h at 4°C.  
500 Immobilized IgG was incubated in PBS on the plates prior to PBS/10% FCS treatment.

501 Reporter cell mIL-2 secretion was quantified via ELISA as described previously (Corrales-  
502 Aguilar et al., 2013).

503

#### 504 **Recombinant antigens and monoclonal antibodies to form sICs**

505 Recombinant human (rh) cytokines TNF, IL-5, and VEGFA were obtained from Stem Cell  
506 technologies. Recombinant CD20 was obtained as a peptide (aa141-188) containing the  
507 binding region of rituximab (Creative Biolabs). FcγR-specific mAbs were obtained from Stem  
508 Cell technologies (CD16: clone 3G8; CD32: IV.3). Reverse sICs were generated from these  
509 receptor-specific antibodies using goat-anti-mouse IgG F(ab)<sub>2</sub> fragments (Invitrogen) in a 1:1  
510 ratio. Pharmaceutically produced humanized monoclonal IgG1 antibodies infliximab (Ifx),  
511 bevacizumab (Bvz), mepolizumab (Mpz) and rituximab (Rtx) were obtained from the University  
512 Hospital Pharmacy Freiburg. Mouse anti-hTNFα (IgG2b, R&D Systems, 983003) was used to  
513 generate sICs reactive with mouse FcγRs. sICs were generated by incubation of antigens and  
514 antibodies in reporter cell medium or PBS for 2 h at 37°C.

515

#### 516 **Lentiviral transduction**

517 Lentiviral transduction was performed as described previously (Kolb et al., 2019; Van den  
518 Hoecke et al., 2017). In brief, chimeric FcγR-CD3ζ constructs (Corrales-Aguilar et al., 2013)  
519 were cloned into a pUC2CL6IPwo plasmid backbone. For every construct, one 10-cm dish of  
520 packaging cell line at roughly 70% density was transfected with the target construct and two  
521 supplementing vectors providing the VSV gag/pol and VSV-G-env proteins (6 μg of DNA each)  
522 using polyethylenimine (22.5 μg/ml, Sigma) and Polybrene (4 μg/ml; Merck Millipore) in a total  
523 volume of 7 ml (2 ml of a 15-min-preincubated transfection mix in serum-free DMEM added to  
524 5 ml of fresh full DMEM). After a medium change, virus supernatant harvested from the  
525 packaging cell line 2 days after transfection was then incubated with target BW cells overnight  
526 (3.5 ml of supernatant on 10<sup>6</sup> target cells), followed by expansion and pool selection using  
527 complete medium supplemented with 2 μg/ml of puromycin (Sigma) over a one week culture  
528 period.



529

530 **BW5147 toxicity test**

531 Cell counting was performed using a Countess II (Life Technologies) according to supplier  
532 instructions. Cell toxicity was measured as a ratio between live and dead cells judged by trypan  
533 blue staining over a 16 h time frame in a 96well format (100 µl volume per well). BW5147 cells  
534 were mixed 1:1 with Trypan blue (Invitrogen) and analysed using a Countess II. rhTNFα was  
535 diluted in complete medium.

536

537 **human IgG suspension ELISA**

538 1 µg of IgG1 (rituximab in PBS, 50 µl/well) per well was incubated on a 96well microtiter plate  
539 (NUNC Maxisorp) pre-treated (2h at RT) with PBS supplemented with varying percentages  
540 (v/v) of FCS (PAN Biotech). IgG1 bound to the plates was detected using an HRP-conjugated  
541 mouse-anti-human IgG mAb (Jackson ImmunoResearch).

542

543 **BW5147 cell flow cytometry**

544 BW5147 cells were harvested by centrifugation at 900 g and RT from the suspension culture.  
545  $1 \times 10^6$  cells were stained with PE- or FITC-conjugated anti-human FcγR mAbs (BD) or a PE-  
546 TexasRed-conjugated human IgG-Fc fragment (Rockland) for 1h at 4°C in PBS/3%FCS. After  
547 3 washing steps in PBS/3%FCS, the cells were transferred to Flow cytometry tubes (BD) and  
548 analysed using BD LSR Fortessa and FlowJo (V10) software.

549

550 **NK cell activation flow cytometry**

551 PBMC were purified from donor blood using Lymphocyte separation Media (Anprotec). Primary  
552 NK cells were separated from donor PBMCs via magnetic bead negative selection (Stem Cell  
553 technologies). 96well ELISA plates (Nunc Maxisorp) were pre-treated with PBS/10% FCS (v/v)  
554 for 1 h at 4°C. NK cells were stimulated in pre-treated plates and incubated at 37°C and 5%  
555 CO<sub>2</sub> for 4 h. Golgi Plug and Golgi Stop solutions (BD) were added as suggested by supplier.  
556 CD107a (APC, BD, H4A3) specific conjugated mAb was added at the beginning of the

557 incubation period. Following the stimulation period, MIP-1 $\beta$  (PE, BD Pharmigen), IFN $\gamma$  (BV-  
558 510, Biologends, 4SB3) and TNF $\alpha$  (PE/Cy7, Biologends, MAB11) production was measured  
559 via intracellular staining Cytokines (BD, CytoFix/CytoPerm, Kit as suggested by the supplier).  
560 50 ng/ml PMA (InvivoGen) + 0.5  $\mu$ M Ionomycin (InvivoGen) were used as a positive stimulation  
561 control for NK cell activation. After 3 washing steps in PBS/3%FCS, the cells were transferred  
562 to Flow cytometry tubes (BD) and analysed using a BD FACS Fortessa and FlowJo (V10)  
563 software. Fc $\gamma$ RII or Fc $\gamma$ RIII block was performed by addition of receptor specific mAbs (Stem  
564 cell technologies, IV.3 and 3G8) at a 1:100 dilution at the beginning of the incubation period.  
565 Cells were transferred to Flow cytometry tubes (BD) and analyzed using BD LSR Fortessa and  
566 FlowJo (V10) software.

567

#### 568 **Asymmetric flow field flow fractionation (AF4)**

569 The AF4 system consisted of a flow controller (Eclipse AF4, Wyatt), a MALS detector (DAWN  
570 Heleos II, Wyatt), a UV detector (1260 Infinity G1314F, Agilent) and the separation channel  
571 (SC channel, PES membrane, cut-off 10 kDa, 490  $\mu$ m spacer, wide type, Wyatt). Elution buffer:  
572 1.15 g/L Na<sub>2</sub>HPO<sub>4</sub> (Merck), 0.20 g/L NaH<sub>2</sub>PO<sub>4</sub> x H<sub>2</sub>O (Merck), 8.00 g/L NaCl (Sigma) and 0,20  
573 g/L NaN<sub>3</sub> (Sigma), adjusted to pH 7.4, filtered through 0.1  $\mu$ m. AF4 sequence (Vx = cross flow  
574 in mL/min): (a) elution (2 min, Vx: 1.0); (b) focus (1 min, Vx: 1.0), focus + inject (1 min, Vx: 1.0,  
575 inject flow: 0.2 mL/min), repeated three times; (c) elution (30 min, linear Vx gradient: 1.0 to  
576 0.0); (d) elution (15 min, Vx: 0.0); (e) elution + inject (5 min, Vx: 0.0). A total protein mass of  
577 17 $\pm$ 0.3  $\mu$ g (I $\alpha$ , rhTNF $\alpha$  or ICs, respectively) was injected. The eluted sample concentration  
578 was calculated from the UV signal at 280 nm using extinction coefficients of 1.240 mL/(mg cm)  
579 or 1.450 mL/(mg cm) in the case of TNF $\alpha$  or I $\alpha$ , respectively. For the ICs, extinction coefficients  
580 were not available and difficult to calculate as the exact stoichiometry is not known. An  
581 extinction coefficient of 1.450 mL/(mg cm) was used for calculating the molar masses of all  
582 ICs. Especially in the case of ICs rich in TNF $\alpha$ , the true coefficients should be lower, and the  
583 molar masses of these complexes are overestimated by not more than 14 %. The determined  
584 molar masses for TNF $\alpha$ -rich complexes are therefore biased but the observed variations in

585 molar mass for the different ICs remain valid. The mass-weighted mean of the distribution of  
586 molar masses for each sample was calculated using the ASTRA 7 software package (Wyatt).  
587

### 588 **SLE patient cohort**

589 Sera from patients with SLE were provided by the ImmRheum biobank of the Department of  
590 Rheumatology and Clinical Immunology. Biobanking and the project were approved by the  
591 local ethical committee of the University of Freiburg (votes 507/16 and 624/14). All patients  
592 who provided blood to the biobank had provided written informed consent. Ethical Statement:  
593 The study was designed in accordance with the guidelines of the Declaration of Helsinki  
594 (revised 2013). Patients with SLE ( $n = 25$ ) and healthy controls ( $n = 4$ ) were examined. All  
595 patients met the revised ACR classification criteria for SLE. Disease activity was assessed  
596 using the SLEDAI-2K score. Serum concentrations of anti-double-stranded DNA ( $\alpha$ -dsDNA)  
597 and the complement cleavage product Cd3 were monitored and indicated as IU/ml and mg/ml,  
598 respectively. Anti-dsDNA concentrations in units and C3d concentrations provide sensitive  
599 markers for disease activity in SLE.

600

### 601 **Patient serum IC precipitation**

602 For polyethylene glycol (PEG) precipitation human sera were mixed with PEG 6000 (Sigma-  
603 Aldrich) in PBS at a final concentration of 10% PEG 6000. After overnight incubation at 4°C,  
604 ICs were precipitated by centrifugation at 2000 x g for 30 min at 4 °C, pellets were washed  
605 once with PEG 6000 and then centrifugated at 2000 x g for 20 min at 4 °C. Supernatants were  
606 harvested and precipitates re-suspended in pre-warmed PBS for 1 h at 37 °C. IgG  
607 concentrations of serum, precipitates and supernatants obtained after precipitation were  
608 quantified by Nanodrop (Thermo Scientific™) measurement.

609

### 610 **Mice and Models**

611 Animal experiments were approved by the local governmental commission for animal  
612 protection of Freiburg (Regierungspräsidium Freiburg, approval no. G16/59 and G19/21).

613 Lupus-prone (NZBxNZW)F1 mice (NZB/WF1) were generated by crossing NZB/BINJ mice with  
614 NZW/LacJ mice, purchased from The Jackson Laboratory. KRNTg mice were obtained from F.  
615 Nimmerjahn (Universität Erlangen-Nürnberg) with the permission of D. Mathis and C. Benoist  
616 (Harvard Medical School, Boston, MA), C57BL/6 mice (BL/6) and NOD/ShiLtJArc (NOD/Lt)  
617 mice were obtained from the Charles River Laboratories. K/BxN (KRNTgxNOD)F1 mice  
618 (K/BxN) were obtained by crossing KRNTg mice and NOD/Lt mice. All mice were housed in a  
619 12-h light/dark cycle, with food and water ad libitum. Mice were euthanized and blood collected  
620 for serum preparation from 16 weeks old BL/6 animals, from 16 weeks old arthritic K/BxN  
621 animals and from 26 – 38 weeks old NZB/WF1 mice with established glomerulonephritis.

622

### 623 **Statistical analyses**

624 Statistical analyses were performed using Graphpad Prism software (v6) and appropriate  
625 tests.

626

### 627 **Funding**

628 This work was supported by an intramural junior investigator fund of the Faculty of Medicine  
629 to PK (EQUIP - Funding for Medical Scientists, Faculty of Medicine, University of Freiburg), by  
630 the German Research foundation (DFG) (FOR2830 HE 2526/9-1) to HH, by the DFG research  
631 grant TRR130 to REV and the Ministry of Science, Research, and Arts Baden-Württemberg  
632 (Margarete von Wrangell Programm) to NC.

633

### 634 **Acknowledgement**

635 We thank T. Schleyer (ImmRheum Biobank) for providing patient samples.

636

### 637 **Competing interests**

638 We declare no financial and non-financial competing interests.

639

640

641

## 642 References

- 643 Anania, J.C., A.M. Chenoweth, B.D. Wines, and P.M. Hogarth. 2019. The Human FcγRII  
644 (CD32) Family of Leukocyte FcR in Health and Disease. *Front Immunol* 10:464.
- 645 Antes, U., H.P. Heinz, D. Schultz, D. Brackertz, and M. Loos. 1991. C1q-bearing immune  
646 complexes detected by a monoclonal antibody to human C1q in rheumatoid arthritis  
647 sera and synovial fluids. *Rheumatol Int* 10:245-250.
- 648 Bano, A., A. Pera, A. Almoukayed, T.H.S. Clarke, S. Kirmani, K.A. Davies, and F. Kern. 2019.  
649 CD28 (null) CD4 T-cell expansions in autoimmune disease suggest a link with  
650 cytomegalovirus infection. *F1000Res* 8:
- 651 Berger, S., H. Ballo, and H.J. Stutte. 1996. Immune complex-induced interleukin-6, interleukin-  
652 10 and prostaglandin secretion by human monocytes: A network of pro- and anti-  
653 inflammatory cytokines dependent on the antigen:antibody ratio. *Eur J Immunol*  
654 26:1297-1301.
- 655 Bohm, S., D. Kao, and F. Nimmerjahn. 2014. Sweet and sour: the role of glycosylation for the  
656 anti-inflammatory activity of immunoglobulin G. *Current topics in microbiology and*  
657 *immunology* 382:393-417.
- 658 Bournazos, S., T.T. Wang, R. Dahan, J. Maamary, and J.V. Ravetch. 2017. Signaling by  
659 Antibodies: Recent Progress. *Annu Rev Immunol* 35:285-311.
- 660 Breunis, W.B., E. van Mirre, M. Bruin, J. Geissler, M. de Boer, M. Peters, D. Roos, M. de Haas,  
661 H.R. Koene, and T.W. Kuijpers. 2008. Copy number variation of the activating FCGR2C  
662 gene predisposes to idiopathic thrombocytopenic purpura. *Blood* 111:1029-1038.
- 663 Bruhns, P. 2012. Properties of mouse and human IgG receptors and their contribution to  
664 disease models. *Blood* 119:5640-5649.
- 665 Bruhns, P., B. Iannascoli, P. England, D.A. Mancardi, N. Fernandez, S. Jorieux, and M.  
666 Daeron. 2009a. Specificity and affinity of human Fc gamma receptors and their  
667 polymorphic variants for human IgG subclasses. *Blood* 113:3716-3725.
- 668 Bruhns, P., B. Iannascoli, P. England, D.A. Mancardi, N. Fernandez, S. Jorieux, and M.  
669 Daeron. 2009b. Specificity and affinity of human Fcγ receptors and their  
670 polymorphic variants for human IgG subclasses. *Blood* 113:3716-3725.
- 671 Bruhns, P., and F. Jonsson. 2015. Mouse and human FcR effector functions. *Immunol Rev*  
672 268:25-51.
- 673 Corrales-Aguilar, E., M. Trilling, K. Hunold, M. Fiedler, V.T. Le, H. Reinhard, K. Ehrhardt, E.  
674 Merce-Maldonado, E. Aliyev, A. Zimmermann, D.C. Johnson, and H. Hengel. 2014.  
675 Human cytomegalovirus Fcγ binding proteins gp34 and gp68 antagonize  
676 Fcγ receptors I, II and III. *PLoS pathogens* 10:e1004131.
- 677 Corrales-Aguilar, E., M. Trilling, H. Reinhard, E. Merce-Maldonado, M. Widera, H. Schaal, A.  
678 Zimmermann, O. Mandelboim, and H. Hengel. 2013. A novel assay for detecting virus-  
679 specific antibodies triggering activation of Fcγ receptors. *Journal of*  
680 *immunological methods* 387:21-35.
- 681 Duchemin, A.M., L.K. Ernst, and C.L. Anderson. 1994. Clustering of the High-Affinity Fc  
682 Receptor for Immunoglobulin-G (Fc-γRI) Results in Phosphorylation of Its  
683 Associated γ-Chain. *J Biol Chem* 269:12111-12117.
- 684 Fossati, G., R.C. Bucknall, and S.W. Edwards. 2002a. Insoluble and soluble immune  
685 complexes activate neutrophils by distinct activation mechanisms: changes in  
686 functional responses induced by priming with cytokines. *Ann Rheum Dis* 61:13-19.
- 687 Fossati, G., R.C. Bucknall, and S.W. Edwards. 2002b. Insoluble and soluble immune  
688 complexes activate neutrophils by distinct activation mechanisms: changes in  
689 functional responses induced by priming with cytokines. *Ann Rheum Dis* 61:13-19.
- 690 Getahun, A., and J.C. Cambier. 2015. Of ITIMs, ITAMs, and ITAMis: revisiting immunoglobulin  
691 Fc receptor signaling. *Immunol Rev* 268:66-73.
- 692 Goodier, M.R., C. Lusa, S. Sherratt, A. Rodriguez-Galan, R. Behrens, and E.M. Riley. 2016.  
693 Sustained Immune Complex-Mediated Reduction in CD16 Expression after  
694 Vaccination Regulates NK Cell Function. *Front Immunol* 7:384.

- 695 Granger, V., M. Peyneau, S. Chollet-Martin, and L. de Chaisemartin. 2019. Neutrophil  
696 Extracellular Traps in Autoimmunity and Allergy: Immune Complexes at Work. *Front*  
697 *Immunol* 10:2824.
- 698 Greenberg, S., P. Chang, and S.C. Silverstein. 1994. Tyrosine phosphorylation of the gamma  
699 subunit of Fc gamma receptors, p72syk, and paxillin during Fc receptor-mediated  
700 phagocytosis in macrophages. *J Biol Chem* 269:3897-3902.
- 701 Guillems, M., P. Bruhns, Y. Saeys, H. Hammad, and B.N. Lambrecht. 2014. The function of  
702 Fc gamma receptors in dendritic cells and macrophages. *Nat Rev Immunol* 14:94-108.
- 703 Heidelberger, M., and F.E. Kendall. 1929. A Quantitative Study of the Precipitin Reaction  
704 between Type iii Pneumococcus Polysaccharide and Purified Homologous Antibody. *J*  
705 *Exp Med* 50:809-823.
- 706 Hubbard, J.J., M. Pyzik, T. Rath, L.K. Kozicky, K.M.K. Sand, A.K. Gandhi, A. Grevys, S. Foss,  
707 S.C. Menzies, J.N. Glickman, E. Fiebiger, D.C. Roopenian, I. Sandlie, J.T. Andersen,  
708 L.M. Sly, K. Baker, and R.S. Blumberg. 2020. FcRn is a CD32a coreceptor that  
709 determines susceptibility to IgG immune complex-driven autoimmunity. *J Exp Med* 217:  
710 Indik, Z.K., S. Hunter, M.M. Huang, X.Q. Pan, P. Chien, C. Kelly, A.I. Levinson, R.P. Kimberly,  
711 and A.D. Schreiber. 1994. The high affinity Fc gamma receptor (CD64) induces  
712 phagocytosis in the absence of its cytoplasmic domain: the gamma subunit of Fc  
713 gamma RIIIA imparts phagocytic function to Fc gamma RI. *Exp Hematol* 22:599-606.
- 714 Kaneko, Y., F. Nimmerjahn, and J.V. Ravetch. 2006. Anti-inflammatory activity of  
715 immunoglobulin G resulting from Fc sialylation. *Science* 313:670-673.
- 716 Kang, S., A.B. Keener, S.Z. Jones, R.J. Benschop, A. Caro-Maldonado, J.C. Rathmell, S.H.  
717 Clarke, G.K. Matsushima, J.K. Whitmire, and B.J. Vilen. 2016. IgG-Immune Complexes  
718 Promote B Cell Memory by Inducing BAFF. *J Immunol* 196:196-206.
- 719 Kiefer, F., J. Brumell, N. Al-Alawi, S. Latour, A. Cheng, A. Veillette, S. Grinstein, and T.  
720 Pawson. 1998. The Syk protein tyrosine kinase is essential for Fc gamma receptor  
721 signaling in macrophages and neutrophils. *Mol Cell Biol* 18:4209-4220.
- 722 Koenderman, L. 2019. Inside-Out Control of Fc-Receptors. *Front Immunol* 10:544.
- 723 Koffler, D., V. Agnello, R. Thoburn, and H.G. Kunkel. 1971. Systemic lupus erythematosus:  
724 prototype of immune complex nephritis in man. *J Exp Med* 134:169-179.
- 725 Kolb, P., S. Sijmons, M.R. McArdle, H. Taher, J. Womack, C. Hughes, A. Ventura, M.A. Jarvis,  
726 C. Stahl-Hennig, S. Hansen, L.J. Picker, D. Malouli, H. Hengel, and K. Fruh. 2019.  
727 Identification and Functional Characterization of a Novel Fc Gamma-Binding  
728 Glycoprotein in Rhesus Cytomegalovirus. *J Virol* 93:
- 729 Laborde, E.A., S. Vanzulli, M. Beigier-Bompadre, M.A. Isturiz, R.A. Ruggiero, M.G. Fourcade,  
730 A.C. Catalan Pellet, S. Sozzani, and M. Vulcano. 2007. Immune complexes inhibit  
731 differentiation, maturation, and function of human monocyte-derived dendritic cells. *J*  
732 *Immunol* 179:673-681.
- 733 Lagasse, H.A.D., H. Hengel, B. Golding, and Z.E. Sauna. 2019. Fc-Fusion Drugs Have  
734 Fc gamma R/C1q Binding and Signaling Properties That May Affect Their  
735 Immunogenicity. *AAPS J* 21:62.
- 736 Li, T., D.J. DiLillo, S. Bournazos, J.P. Giddens, J.V. Ravetch, and L.X. Wang. 2017. Modulating  
737 IgG effector function by Fc glycan engineering. *Proceedings of the National Academy*  
738 *of Sciences of the United States of America* 114:3485-3490.
- 739 Lisi, S., M. Sisto, D.D. Lofrumento, S. D'Amore, and M. D'Amore. 2011. Advances in the  
740 understanding of the Fc gamma receptors-mediated autoantibodies uptake. *Clin Exp*  
741 *Med* 11:1-10.
- 742 Lu, L.L., T.J. Suscovich, S.M. Fortune, and G. Alter. 2018. Beyond binding: antibody effector  
743 functions in infectious diseases. *Nat Rev Immunol* 18:46-61.
- 744 Luo, Y., J.W. Pollard, and A. Casadevall. 2010. Fc gamma receptor cross-linking stimulates  
745 cell proliferation of macrophages via the ERK pathway. *J Biol Chem* 285:4232-4242.
- 746 Lux, A., X. Yu, C.N. Scanlan, and F. Nimmerjahn. 2013. Impact of immune complex size and  
747 glycosylation on IgG binding to human Fc gamma Rs. *J Immunol* 190:4315-4323.
- 748 Madalinski, K., B. Burczynska, K.H. Heermann, A. Uy, and W.H. Gerlich. 1991. Analysis of  
749 viral proteins in circulating immune complexes from chronic carriers of hepatitis B virus.  
750 *Clin Exp Immunol* 84:493-500.

- 751 Mathsson, L., E. Ahlin, C. Sjowall, T. Skogh, and J. Ronnelid. 2007. Cytokine induction by  
752 circulating immune complexes and signs of in-vivo complement activation in systemic  
753 lupus erythematosus are associated with the occurrence of anti-Sjogren's syndrome A  
754 antibodies. *Clin Exp Immunol* 147:513-520.
- 755 Mayadas, T.N., G.C. Tsokos, and N. Tsuboi. 2009. Mechanisms of immune complex-mediated  
756 neutrophil recruitment and tissue injury. *Circulation* 120:2012-2024.
- 757 Metes, D., L.K. Ernst, W.H. Chambers, A. Sulica, R.B. Herberman, and P.A. Morel. 1998.  
758 Expression of functional CD32 molecules on human NK cells is determined by an allelic  
759 polymorphism of the FcgammaRIIC gene. *Blood* 91:2369-2380.
- 760 Morizono, K., A. Ku, Y. Xie, A. Harui, S.K. Kung, M.D. Roth, B. Lee, and I.S. Chen. 2010.  
761 Redirecting lentiviral vectors pseudotyped with Sindbis virus-derived envelope proteins  
762 to DC-SIGN by modification of N-linked glycans of envelope proteins. *J Virol* 84:6923-  
763 6934.
- 764 Nimmerjahn, F., and J.V. Ravetch. 2006. Fcgamma receptors: old friends and new family  
765 members. *Immunity* 24:19-28.
- 766 Nimmerjahn, F., and J.V. Ravetch. 2008. Fcgamma receptors as regulators of immune  
767 responses. *Nat Rev Immunol* 8:34-47.
- 768 Nimmerjahn, F., and J.V. Ravetch. 2010. Antibody-mediated modulation of immune  
769 responses. *Immunol Rev* 236:265-275.
- 770 Patel, K.R., J.T. Roberts, and A.W. Barb. 2019. Multiple Variables at the Leukocyte Cell  
771 Surface Impact Fc gamma Receptor-Dependent Mechanisms. *Front Immunol* 10:223.
- 772 Pierson, T.C., Q. Xu, S. Nelson, T. Oliphant, G.E. Nybakken, D.H. Fremont, and M.S.  
773 Diamond. 2007. The stoichiometry of antibody-mediated neutralization and  
774 enhancement of West Nile virus infection. *Cell Host Microbe* 1:135-145.
- 775 Pincetic, A., S. Bournazos, D.J. DiLillo, J. Maamary, T.T. Wang, R. Dahan, B.M. Fiebiger, and  
776 J.V. Ravetch. 2014. Type I and type II Fc receptors regulate innate and adaptive  
777 immunity. *Nat Immunol* 15:707-716.
- 778 Plomp, R., L.R. Ruhaak, H.W. Uh, K.R. Reiding, M. Selman, J.J. Houwing-Duistermaat, P.E.  
779 Slagboom, M. Beekman, and M. Wuhler. 2017. Subclass-specific IgG glycosylation is  
780 associated with markers of inflammation and metabolic health. *Sci Rep* 7:12325.
- 781 Ravetch, J.V., and S. Bolland. 2001. IgG Fc receptors. *Annu Rev Immunol* 19:275-290.
- 782 Saunders, K.O. 2019. Conceptual Approaches to Modulating Antibody Effector Functions and  
783 Circulation Half-Life. *Front Immunol* 10:1296.
- 784 Tahir, S., Y. Fukushima, K. Sakamoto, K. Sato, H. Fujita, J. Inoue, T. Uede, Y. Hamazaki, M.  
785 Hattori, and N. Minato. 2015. A CD153+CD4+ T follicular cell population with cell-  
786 senescence features plays a crucial role in lupus pathogenesis via osteopontin  
787 production. *J Immunol* 194:5725-5735.
- 788 Tanaka, M., S.R. Krutzik, P.A. Sieling, D.J. Lee, T.H. Rea, and R.L. Modlin. 2009. Activation  
789 of Fc gamma RI on monocytes triggers differentiation into immature dendritic cells that  
790 induce autoreactive T cell responses. *J Immunol* 183:2349-2355.
- 791 Tay, M.Z., K. Wiehe, and J. Pollara. 2019. Antibody-Dependent Cellular Phagocytosis in  
792 Antiviral Immune Responses. *Front Immunol* 10:332.
- 793 Van den Hoecke, S., K. Ehrhardt, A. Kolpe, K. El Bakkouri, L. Deng, H. Grootaert, S.  
794 Schoonoghe, A. Smet, M. Bentahir, K. Roose, M. Schotsaert, B. Schepens, N.  
795 Callewaert, F. Nimmerjahn, P. Staeheli, H. Hengel, and X. Saelens. 2017. Hierarchical  
796 and Redundant Roles of Activating FcgammaRs in Protection against Influenza  
797 Disease by M2e-Specific IgG1 and IgG2a Antibodies. *J Virol* 91:
- 798 van der Poel, C.E., R.M. Spaapen, J.G. van de Winkel, and J.H. Leusen. 2011. Functional  
799 characteristics of the high affinity IgG receptor, FcgammaRI. *J Immunol* 186:2699-  
800 2704.
- 801 Vidarsson, G., G. Dekkers, and T. Rispen. 2014. IgG subclasses and allotypes: from structure  
802 to effector functions. *Front Immunol* 5:520.
- 803 Vogelpoel, L.T., D.L. Baeten, E.C. de Jong, and J. den Dunnen. 2015. Control of cytokine  
804 production by human fc gamma receptors: implications for pathogen defense and  
805 autoimmunity. *Front Immunol* 6:79.

- 806 Vuckovic, F., J. Kristic, I. Gudelj, M. Teruel, T. Keser, M. Pezer, M. Pucic-Bakovic, J. Stambuk,  
807 I. Trbojevic-Akmacic, C. Barrios, T. Pavic, C. Menni, Y. Wang, Y. Zhou, L. Cui, H. Song,  
808 Q. Zeng, X. Guo, B.A. Pons-Estel, P. McKeigue, A. Leslie Patrick, O. Gornik, T.D.  
809 Spector, M. Harjacek, M. Alarcon-Riquelme, M. Molokhia, W. Wang, and G. Lauc.  
810 2015. Association of systemic lupus erythematosus with decreased  
811 immunosuppressive potential of the IgG glycome. *Arthritis Rheumatol* 67:2978-2989.
- 812 Vuitton, D.A., L. Vuitton, E. Seilles, and P. Galanaud. 2020. A plea for the pathogenic role of  
813 immune complexes in severe Covid-19. *Clin Immunol* 217:108493.
- 814 Wang, T.T., and J.V. Ravetch. 2015. Immune complexes: not just an innocent bystander in  
815 chronic viral infection. *Immunity* 42:213-215.
- 816 Wetter, D.A., and M.D. Davis. 2009. Lupus-like syndrome attributable to anti-tumor necrosis  
817 factor alpha therapy in 14 patients during an 8-year period at Mayo Clinic. *Mayo Clin*  
818 *Proc* 84:979-984.
- 819 Yamada, D.H., H. Elsaesser, A. Lux, J.M. Timmerman, S.L. Morrison, J.C. de la Torre, F.  
820 Nimmerjahn, and D.G. Brooks. 2015. Suppression of Fcγ-receptor-mediated  
821 antibody effector function during persistent viral infection. *Immunity* 42:379-390.
- 822 Zubler, R.H., U. Nydegger, L.H. Perrin, K. Fehr, J. McCormick, P.H. Lambert, and P.A.  
823 Miescher. 1976. Circulating and intra-articular immune complexes in patients with  
824 rheumatoid arthritis. Correlation of 125I-Clq binding activity with clinical and biological  
825 features of the disease. *J Clin Invest* 57:1308-1319.
- 826
- 827



828 **Supplemental Data**

829

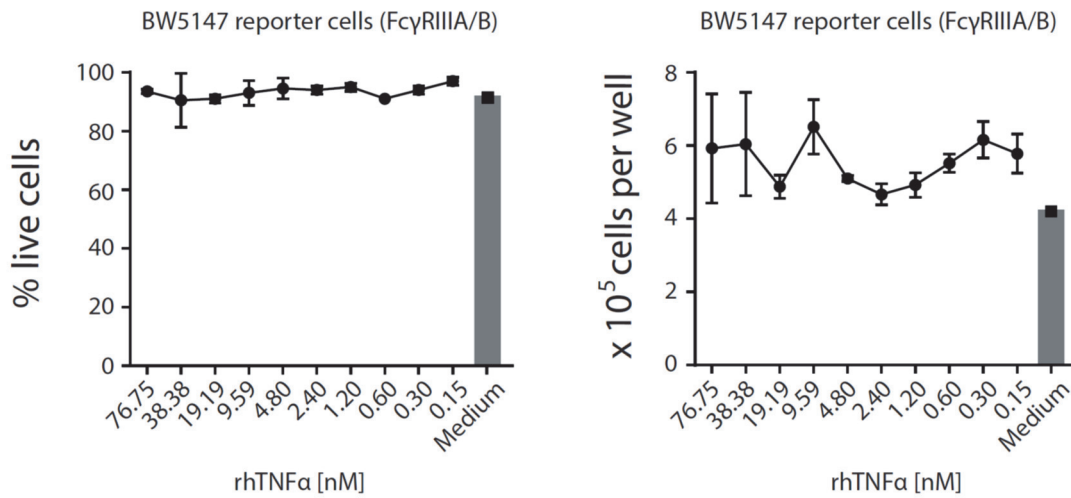

830

831 **Fig. S1. rhTNFα is not toxic to mouse lymphocyte BW5147 cells even at high**  
832 **concentrations.** Cell count and percentage of live cells were unaltered over a 16 h time frame  
833 of reporter cell culture in the presence of indicated rhTNFα concentrations and comparable to  
834 regular growth in complete medium. Experiments were conducted in 3 replicates. Error bars =  
835 SD.

836

837

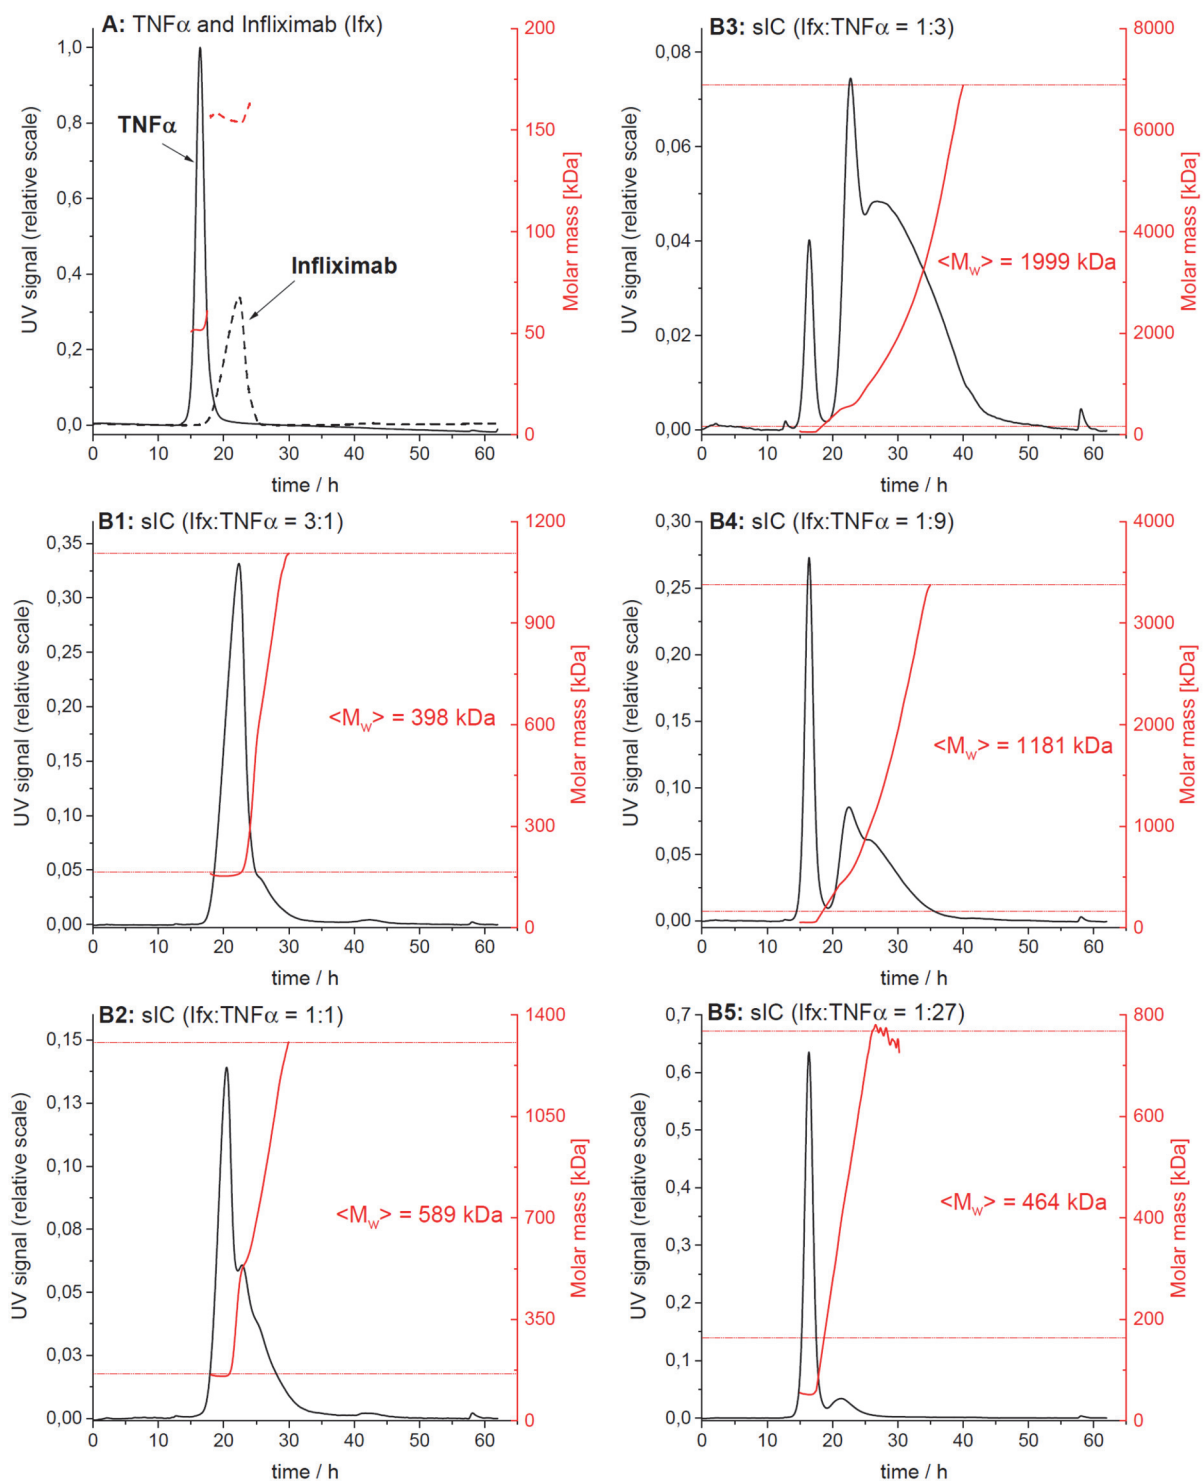

838  
839  
840  
841  
842  
843  
844  
845  
846  
847

**Fig. S2. AF4 elution profiles of Ifx/TNF $\alpha$ -immune complexes.**

The elution profiles from one of three independent runs are shown. Protein concentration in the eluate is shown in black (UV signal at  $\lambda = 280$  nm, normalized to the highest UV signal found in this experiment), molar masses determined by MALS for a given retention time in red. Horizontal red lines indicate the range of molar masses used to calculate the mass-weighted mean of molar masses  $\langle M_w \rangle$ . A) Overlay of the elution profiles obtained for TNF $\alpha$  and Ifx, respectively; B1 to B5) Elution profiles for sICs formed after incubation of TNF $\alpha$  and Ifx at different molar ratios.

| Sample           | Range of assigned molar masses [kDa] |                                    |                                    | Mass-weighted mean of assigned molar masses [kDa] |                              |                              |                                        |
|------------------|--------------------------------------|------------------------------------|------------------------------------|---------------------------------------------------|------------------------------|------------------------------|----------------------------------------|
|                  | Run 1                                | Run 2                              | Run 3                              | Run 1                                             | Run 2                        | Run 3                        | Mean $\pm$ SD                          |
| Infliximab, IFX  | 158 – 182                            | 153 – 164                          | 159 – 193                          | 162                                               | 156                          | 163                          | 160 $\pm$ 4                            |
| TNF -alpha       | 52 – 55                              | 51 – 61                            | 52 – 62                            | 52                                                | 52                           | 52                           | 52 $\pm$ 0                             |
| Immune complexes |                                      |                                    |                                    |                                                   |                              |                              |                                        |
| IFX/TNF 3:1      | 182 – 1.16 $\cdot$ 10 <sup>3</sup>   | 164 – 1.11 $\cdot$ 10 <sup>3</sup> | 193 – 1.10 $\cdot$ 10 <sup>3</sup> | 409                                               | 398                          | 518                          | 442 $\pm$ 66                           |
| IFX/TNF 1:1      | 182 – 2.06 $\cdot$ 10 <sup>3</sup>   | 164 – 1.31 $\cdot$ 10 <sup>3</sup> | 193 – 1.42 $\cdot$ 10 <sup>3</sup> | 801                                               | 589                          | 681                          | 690 $\pm$ 106                          |
| IFX/TNF 1:3      | 182 – 5.05 $\cdot$ 10 <sup>3</sup>   | 164 – 6.89 $\cdot$ 10 <sup>3</sup> | 193 – 10.8 $\cdot$ 10 <sup>3</sup> | 1.77 $\cdot$ 10 <sup>3</sup>                      | 2.00 $\cdot$ 10 <sup>3</sup> | 2.61 $\cdot$ 10 <sup>3</sup> | 2.13 $\cdot$ 10 <sup>3</sup> $\pm$ 435 |
| IFX/TNF 1:9      | 182 – 5.36 $\cdot$ 10 <sup>3</sup>   | 164 – 3.38 $\cdot$ 10 <sup>3</sup> | 193 – 3.51 $\cdot$ 10 <sup>3</sup> | 1.66 $\cdot$ 10 <sup>3</sup>                      | 1.18 $\cdot$ 10 <sup>3</sup> | 1.17 $\cdot$ 10 <sup>3</sup> | 1.34 $\cdot$ 10 <sup>3</sup> $\pm$ 279 |
| IFX/TNF 1:27     | 182 – 1.68 $\cdot$ 10 <sup>3</sup>   | 164 – 768                          | 193 – 1.01 $\cdot$ 10 <sup>3</sup> | 689                                               | 464                          | 521                          | 558 $\pm$ 117                          |

848  
849  
850  
851  
852  
853  
854  
855  
856  
857  
858

**Table S1. Analysis of the molar mass distribution of ICs from AF4 data.**

For a given elution time, the AF4 profiles provide the concentration (UV) at which a given molar mass (MALS) of a protein is present in the sample. The molar mass distribution of lfx, TNF $\alpha$  and their immune complexes (sICs) was obtained by plotting the cumulative frequency as a function of molar mass. For a selected range of molar masses, a mass-weighted mean value ( $\langle M_w \rangle$ ) was calculated. All detected molar masses were selected in the case of lfx and TNF $\alpha$  whereas only molar masses larger than the maximal molar mass found for lfx were assigned to sICs. The table shows the range of assigned molar masses and the calculated  $\langle M_w \rangle$  for each AF4 run (n = 3).
